1 Reward-based improvements in motor control are driven  
2 by multiple error-reducing mechanisms

3 Olivier Codol <sup>1</sup>, Peter J. Holland <sup>1</sup>

4 Sanjay G. Manohar <sup>2</sup>, Joseph M. Galea <sup>1</sup>

5 5th August 2019

6 <sup>1</sup> *School of Psychology, University of Birmingham, UK*

7 <sup>2</sup> *Nuffield Department of Clinical Neurosciences, John Radcliffe Hospital, University of*  
8 *Oxford, UK*

9 \* *For correspondance: [codol.olivier@gmail.com](mailto:codol.olivier@gmail.com)*

10

---

11 Reward has a remarkable ability to invigorate motor behaviour, enabling individuals to select  
12 and execute actions with greater precision and speed. However, if reward is to be exploited  
13 in applied settings such as rehabilitation, a thorough understanding of its underlying mech-  
14 anisms is required. Although reward-driven enhancement of movement execution has been  
15 proposed to occur through enhanced feedback control, an untested alternative is that it is  
16 driven by increased arm stiffness, an energy-consuming process that increases limb stability.  
17 First, we demonstrate that during reaching reward improves selection and execution per-  
18 formance concomitantly without interference. Computational analysis revealed that reward  
19 led to both an increase in feedback correction during movement and a reduction in mo-  
20 tor noise near the target. We provide novel evidence that this noise reduction is driven by a  
21 reward-dependent increase in arm stiffness. Therefore, reward drives multiple error-reduction  
22 mechanisms which enable individuals to invigorate motor performance without compromising  
23 accuracy.

## 25 **1 Introduction**

26 Motor control involves two main components that may be individually optimised, action  
27 selection and action execution (Chen, Holland & Galea, 2018). While the former addresses  
28 the problem of finding the best action to achieve a goal amongst a subset of actions, the latter  
29 is concerned with performing the selected action with the greatest precision possible (Chen,  
30 Holland & Galea, 2018; Shmuelof et al., 2014; Stanley & Krakauer, 2013). Naturally, both  
31 processes come at a computational cost, meaning the faster an action is selected or executed,  
32 the more prone it is to errors – a phenomenon formalised as Fitts’ law (Fitts, 1954). This is  
33 represented in a speed-accuracy function where accuracy decays as speed increases. Because  
34 speed-accuracy functions are a hallmark of human limitation in motor control, they have  
35 been regularly used to quantify performance (Reis et al., 2009; Telgen et al., 2014). For  
36 example, in skill learning, one may see the speed-accuracy function shift so that higher levels  
37 of accuracy are observed for any given speed (Reis et al., 2009; Telgen et al., 2014).

38 Interestingly, both action selection and action execution are highly susceptible to the  
39 presence of reward. For instance, introducing monetary reward in a sequence learning task  
40 leads to a reduction in selection errors, as well as a decrease in reaction times, suggesting  
41 faster computation at no cost to accuracy (Wachter et al., 2009). Similarly, in a saccade task,  
42 reward reduced participant’s reaction time whilst making them less sensitive to distractors  
43 (Manohar et al., 2015). It has also been shown that reward invigorates movement execution  
44 by increasing peak velocity and accuracy during saccades (Manohar et al., 2015; Takikawa et  
45 al., 2002) and reaching movements (Carroll et al., 2019; Galaro et al., 2019; Summerside et  
46 al., 2018). Therefore, this body of work suggests that reward can consistently shift the speed-  
47 accuracy function, at least in isolation, of both selection and execution. It has also been shown  
48 that in saccades reward can enhance the selection and execution components concomitantly  
49 (Manohar et al., 2015). However, it is currently unclear whether this generalizes to more  
50 complex reaching movements. As the use of reward has generated much interest as a potential

51 tool to enhance rehabilitation procedures for clinical populations (Goodman et al., 2014;  
52 Quattrocchi et al., 2017), it is crucial to determine whether reward can improve the selection  
53 and execution components of a reaching movement without interference.

54 Another open question is how reward mechanistically drives improvements in perform-  
55 ance. Recent work in eye and reaching movements suggests that reward acts by increasing  
56 feedback control, enhancing one's ability to correct for movement error (Carroll et al., 2019;  
57 Manohar et al., 2019). However, there are far simpler mechanisms which reward could utilize  
58 to improve execution. For example, the motor system has the ability to control the stiffness  
59 of its effectors, such as the arm during a reaching task, by employing co-contraction of ant-  
60 agonist muscles at once (Gribble et al., 2003; Perreault et al., 2002). This increase in arm  
61 stiffness results in the limb being more stable in the face of perturbations (Franklin et al.,  
62 2007), and capable of absorbing noise that may arise during the movement itself (Selen et al.,  
63 2009; Ueyama & Miyashita, 2013), thus reducing error and improving performance (Gribble  
64 et al., 2003). Yet, it is unclear whether the reward-based improvements in execution are  
65 related to increased arm stiffness.

66 To address these questions, we devised a reaching task in which participants could be  
67 rewarded with money as a function of their reaction time and movement time. Occasionally,  
68 distractor targets of a different colour appeared, and participants were told to withhold  
69 movement until the correct target subsequently appeared, allowing for a selection component  
70 to be quantified. In a first experiment, we show that reward improves both selection and  
71 execution concomitantly, and that the presence or absence of reward, rather than reward  
72 magnitude modulated this effect. In a second experiment, we asked whether punishment  
73 had a similar effect to reward. We demonstrate that although both reward and punishment  
74 led to similar effects, action execution, but not action selection, showed a more global, non-  
75 contingent sensitivity to punishment. Behavioural and computational analysis suggested  
76 that in addition to an increase in feedback corrections during movement, reward may have

77 improved motor execution through an increase in arm stiffness leading to a decrease in  
 78 motor noise at the end of the movement. In a third and fourth experiment, we tested  
 79 this hypothesis and provide evidence that this reduction in noise is driven by a reward-  
 80 dependent increase in arm stiffness. Therefore, reward not only invigorates motor execution  
 81 performance by increasing the contribution of feedback control, but also protects against  
 82 noise at the peripheral level via an increase in arm stiffness.

## 83 2 Results

### 84 2.1 Reward concomitantly enhances action selection and action 85 execution

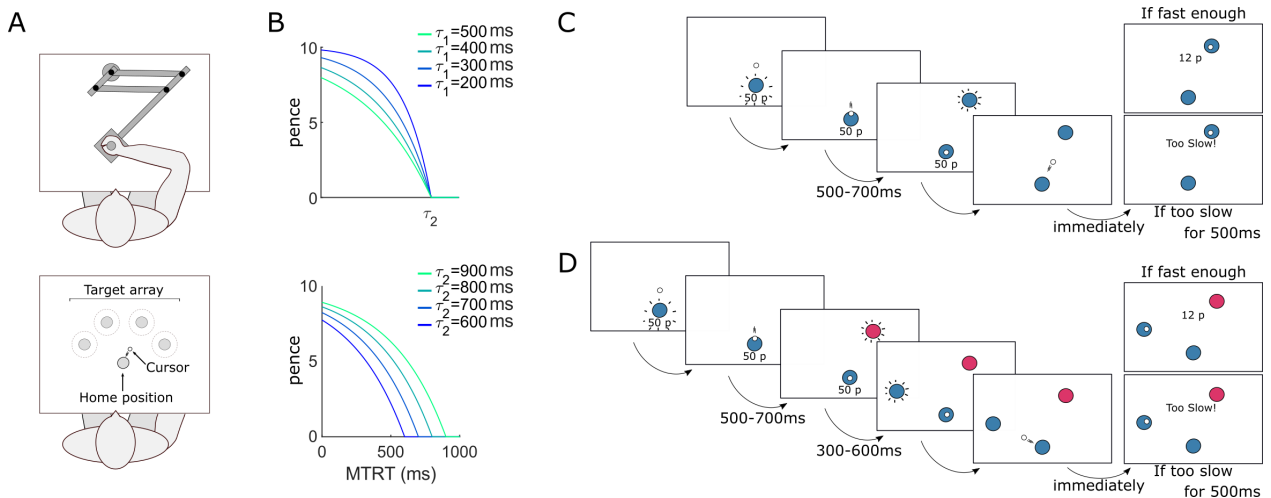

**Figure 1. Reaching paradigm.** A. Participants reached to a series of targets using a robotic manipulum. B. The faster participants moved, the more money they made. Speed was the sum of movement time and reaction time (MTRT) and the function varied based on two parameters  $\tau_1$  and  $\tau_2$ . The upper and lower plots show how the function varied as a function of  $\tau_1$  ( $\tau_2$  fixed at 800ms) and  $\tau_2$  ( $\tau_1$  fixed at 400ms), respectively, for a 10p trial. C. Normal trial. Participants reached at a single target and earned money based on their performance speed. If they were too slow (MTRT <  $\tau_2$ ), a message “Too slow!” appeared instead of the reward information. Transition times are indicated below for each screen. A uniform distribution was employed for the transition time jitter. D. Distractor trial. Occasionally, a first target bearing a different colour appeared, and participants were told to wait for the second, correct target to appear and reach toward the latter.

86 Experiment 1 examined the effect of reward on the selection and execution components of  
87 a reaching movement. Whilst holding a robotic manipulandum, participants (N=30) made  
88 discrete reaching movements towards 1 of 4 visual targets presented 20cm away from a cent-  
89 ral start position (figure 1A). To assess the effect of reward value on reaching performance,  
90 participants were informed of the upcoming trial type prior to movement onset: 0p, 10p and  
91 50p. For the 10p and 50p trials participants could earn money based on their combined  
92 reaction time and movement time. The scoring function which translated performance to  
93 monetary gain was adaptive (figure 1B), factoring in the recent history of movement times  
94 and reaction times to ensure participants experienced comparable amounts of reward despite  
95 idiosyncrasies in individual’s reaction times and movement speed (Berret et al., 2018; Reppert  
96 et al., 2018; Manohar et al., 2015). To assess selection and execution performance concomit-  
97 antly, we interleaved normal trials and distractor trials. In normal trials, the target’s colour  
98 matched the starting position colour (figure 1C), while in distractor trials (42% of trials) a  
99 distractor target bearing a different colour than the starting position appeared prior to the  
100 correct target (figure 1D). In this case, participants were instructed to withhold their move-  
101 ment to the distractor and wait until the correct target appeared before making a movement.  
102 If participants exited the starting position upon appearance of a distractor, the trial was  
103 considered as “distracted”. While the probability of initiating reaches to a distractor target  
104 provided a measure of selection accuracy, the associated reaction times provided a selection  
105 speed, allowing us to define a speed-accuracy function (Fitts, 1954; Hübner & Schlösser, 2010;  
106 Manohar et al., 2015). For execution, radial error provided a measure of execution accuracy  
107 while peak velocity during the reach and movement time provided an execution speed, again  
108 allowing us to define a speed-accuracy function.

109 To analyse if speed-accuracy functions were altered by reward, trials for each reward  
110 value and participant were sorted as a function of their speed (reaction time for selection and  
111 peak velocity for execution) and divided into 50 quantiles (Manohar et al., 2015). For each

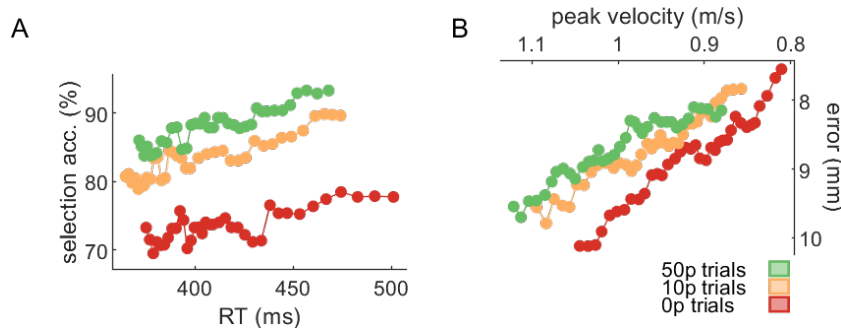

**Figure 2. Speed-accuracy functions for selection (A) and execution (B) shift as reward values increase.** The functions are obtained by sliding a 30% centile window over 50 quantile-based bins. A. For the selection panel, the count of non-distracted trials and distracted trials for each bin was obtained, and the ratio ( $100 \times \text{non-distracted} / \text{total}$ ) calculated afterwards. B. For the execution component, the axes were inverted to match the selection panel in A, *i.e.* the upper left corner indicates faster and more accurate performance. See methods section Data analysis and text for details.

112 quantile, the average accuracy (percentage of non-distracted trials and radial error) over a  
113 30% centile window was obtained. Group averages were then obtained for each quantile in  
114 the speed and accuracy dimension, and results are displayed in figure 2. As expected, reward  
115 shifted the speed-accuracy functions for both selection and execution, underlining augmented  
116 motor performance with reward.

117 Comparing each variable of interest individually, participants showed a clear and consist-  
118 ent improvement in selection accuracy in the presence of reward. Specifically, they were less  
119 likely to be distracted in rewarded trials, though this was independent of reward magnitude  
120 (repeated-measures ANOVA,  $F(2) = 15.8, p < 0.001$ , partial  $\eta^2 = 0.35$ , *post-hoc* 0p vs 10p  
121  $t(29) = -3.34, p = 0.005, d = -0.61$ ; 0p vs 50p  $t(29) = -5.32, p < 0.001, d = -0.97$ ; 10p vs  
122 50p  $t(29) = -2.21, p = 0.07, d = -0.49$ ; figure 3A). However, this did not come at the cost  
123 of slowed decision-making, as reaction times remained largely similar across reward values; if  
124 anything, reaction times were slightly shorter if a large reward (50p) was available compared  
125 to no-reward (0p) trials, though this was not statistically significant ( $F(2) = 2.35, p = 0.10$ ,  
126 partial  $\eta^2 = 0.07$ ; figure 3B-C).

127 In addition, reward led to a marked improvement in action execution by increasing peak

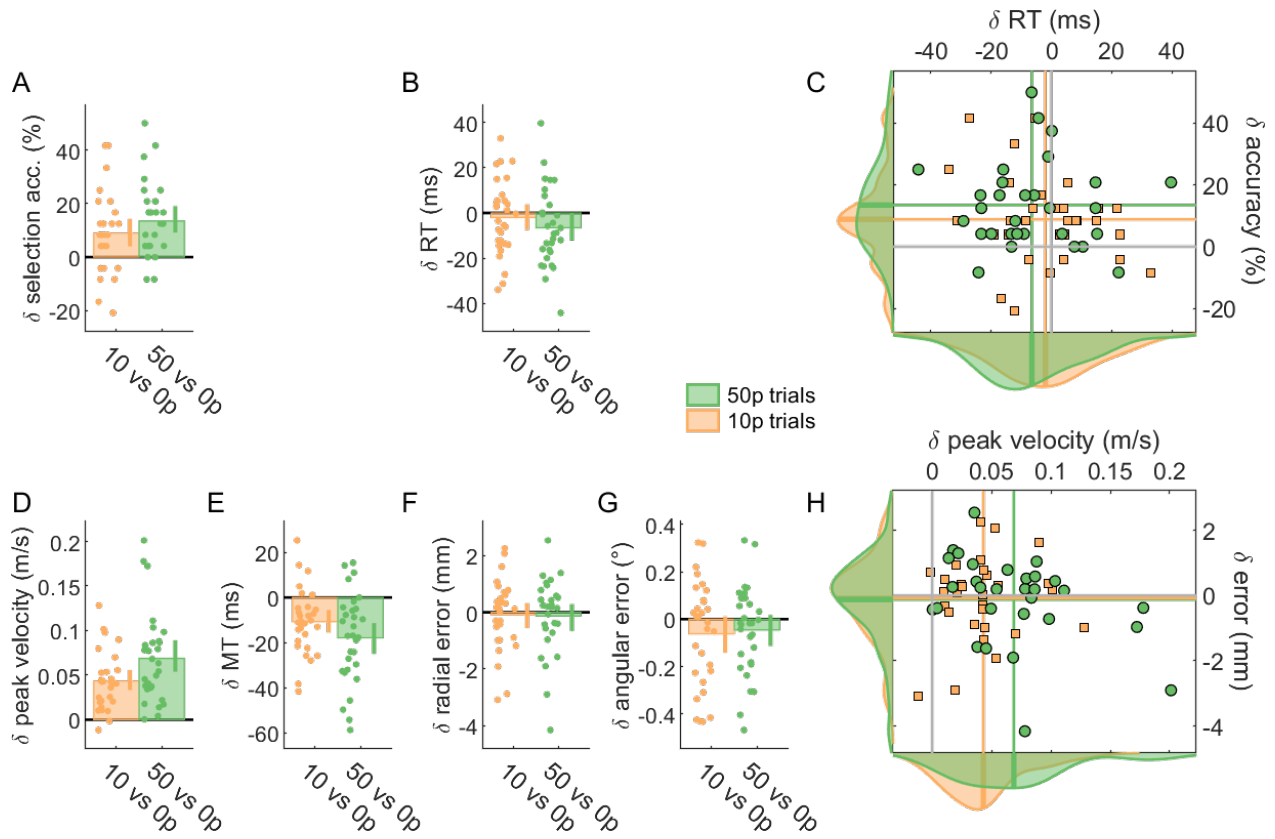

**Figure 3. Reward enhances performance in both selection and execution.** For all bar plots, data was normalised to 0p performance for each individual. Bar height indicates group mean, dots represent individual values and error bars indicate bootstrapped 95% CIs of the mean. A. Selection accuracy, as the percentage of trials where participants initiated reaches toward the correct target instead of the distractor target. B. Mean reaction times. C. Scatterplot of mean reaction time against selection accuracy. Values are normalised to 0p trials. The coloured lines indicate the mean value for each condition, and the solid grey lines indicate the origin, that is, 0p performance. Data distributions are displayed on the sides, with transversal bars indicating the mean of the distribution. Triangles indicate 50p trials. D. Mean peak velocity during reaches. E. Mean movement times of reaches. F. Mean radial error at the end of the reach. G. Mean angular error at the end of the reach. H. Scatterplot showing execution speed (peak velocity) against execution accuracy (radial error), similar to C.

**Figure 3–Figure supplement 1.** Non-normalised data for all variables in the reward-magnitude experiment.

128 velocity that scaled with reward magnitude, although this was driven by three extreme  
 129 values ( $F(2) = 43.0, p < 0.001$ , partial  $\eta^2 = 0.60$ , *post-hoc* 0p vs 10p  $t(29) = -7.40, p <$   
 130  $0.001, d = -1.35$ ; 0p vs 50p  $t(29) = -7.61, p < 0.001, d = -1.39$ ; 10p vs 50p  $t(29) =$   
 131  $-3.52, p = 0.003, d = -0.64$ ; figure 3D). Unsurprisingly, movement time also showed a

132 similar effect, that is, mean movement time decreased with reward, though this did not  
133 scale with reward magnitude ( $F(2) = 15.3, p < 0.001$ , partial  $\eta^2 = 0.35$ , *post-hoc* 0p vs 10p  
134  $t(29) = 4.07, p < 0.001, d = 0.74$ ; 0p vs 50p  $t(29) = 4.99, p < 0.001, d = 0.91$ ; 10p vs 50p  
135  $t(29) = 2.08, p = 0.09, d = 0.38$ ; figure 3E). However, this reward-based improvement in  
136 speed did not come at the cost of accuracy as radial error ( $F(2) = 0.15, p = 0.86$ , partial  
137  $\eta^2 = 0.005$ ) and angular error ( $F(2) = 1.51, p = 0.23$ , partial  $\eta^2 = 0.05$ ) remained unchanged  
138 (figure 3F-H).

139 These results demonstrate that reward enhanced the selection and execution compon-  
140 ents of a reaching movement simultaneously and without interference. Interestingly, these  
141 improvements were mainly driven by an increase in accuracy for selection and in speed for  
142 execution. However, reward magnitude had only a marginal impact on the effect of reward  
143 itself, as opposed to the presence or absence of reward *per se*. Consequently, for the remaining  
144 studies, we used the 0p and 50p trial conditions to assess the impact of reward on reaching  
145 performance.

## 146 **2.2 Punishment has the same effect as reward on selection but a** 147 **non-contingent effect on execution**

148 Next, we asked if punishment led to the same effect as reward, as previous reports have shown  
149 that they have dissociable effects on motor performance (Galea et al., 2015; Hamel et al.,  
150 2018; Song & Smiley-Oyen, 2017; Wachter et al., 2009). A new group of participants (N=30)  
151 experienced a reward and a punishment block in a counterbalanced order. In the reward  
152 block, 0p and 50p trials were randomly interleaved. Similar to the previous experiment, on  
153 50p trials participants received money as a result of fast reaction times and movement times.  
154 The punishment block consisted of randomly interleaved -0p and -50p trials which indicated  
155 the maximum amount of money that could be lost on a single trial. At the beginning of this  
156 block, participants were given £11, and on -50p trials, participants lost money as a result of



157 slow reaction times and movement times.

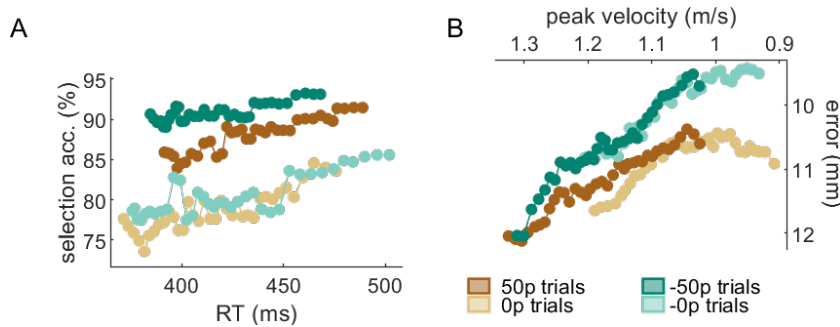

**Figure 4. Reward and punishment speed-accuracy functions for selection (A) and execution (B) components.** The functions are obtained by sliding a 30% centile window over 50 quantile-based bins. A. For the selection panel, the count of non-distracted trials and distracted trials for each bin was obtained, and the ratio ( $100 \times \text{non-distracted} / \text{total}$ ) calculated afterwards. B. For the execution component, the axes were inverted to match the selection panel in A, *i.e.* the upper left corner indicate faster and more accurate performance. See methods section Data analysis and text for details.

158 First, we obtained speed-accuracy functions for the selection and execution components  
159 in the same way as for experiment 1 (figure 4). While punishment had a similar effect on  
160 selection (Figure 4A), it produced dissociable effects on execution (Figure 4B). Specifically,  
161 while peak velocity increased with punishment similarly to reward, it was accompanied by  
162 an increase in radial error. Although this could suggest that punishment does not cause a  
163 change in the speed-accuracy function relative to its own baseline (-0p) trials, a clear shift  
164 in the speed-accuracy function could be seen between the baseline trials of the reward and  
165 punishment conditions (Figure 4B). Therefore, relative to reward, a punishment context  
166 appeared to have a non-contingent beneficial effect on motor execution.

167 To examine these results further, we fitted a mixed-effect linear model  $DV \sim 1 + RP +$   
168  $value + RP : value + (1|participant)$  that included individual intercepts and an interaction  
169 term, where  $DV$  is the dependent variable considered,  $RP$  indicated whether the context  
170 was reward or punishment (*i.e.* reward block or punishment block) and  $value$  indicated  
171 whether the trial is a baseline trial bearing no value (0p and -0p) or a rewarded/punished trial  
172 bearing high value (50p and -50p). as in experiment 1,  $value$  improved selection accuracy

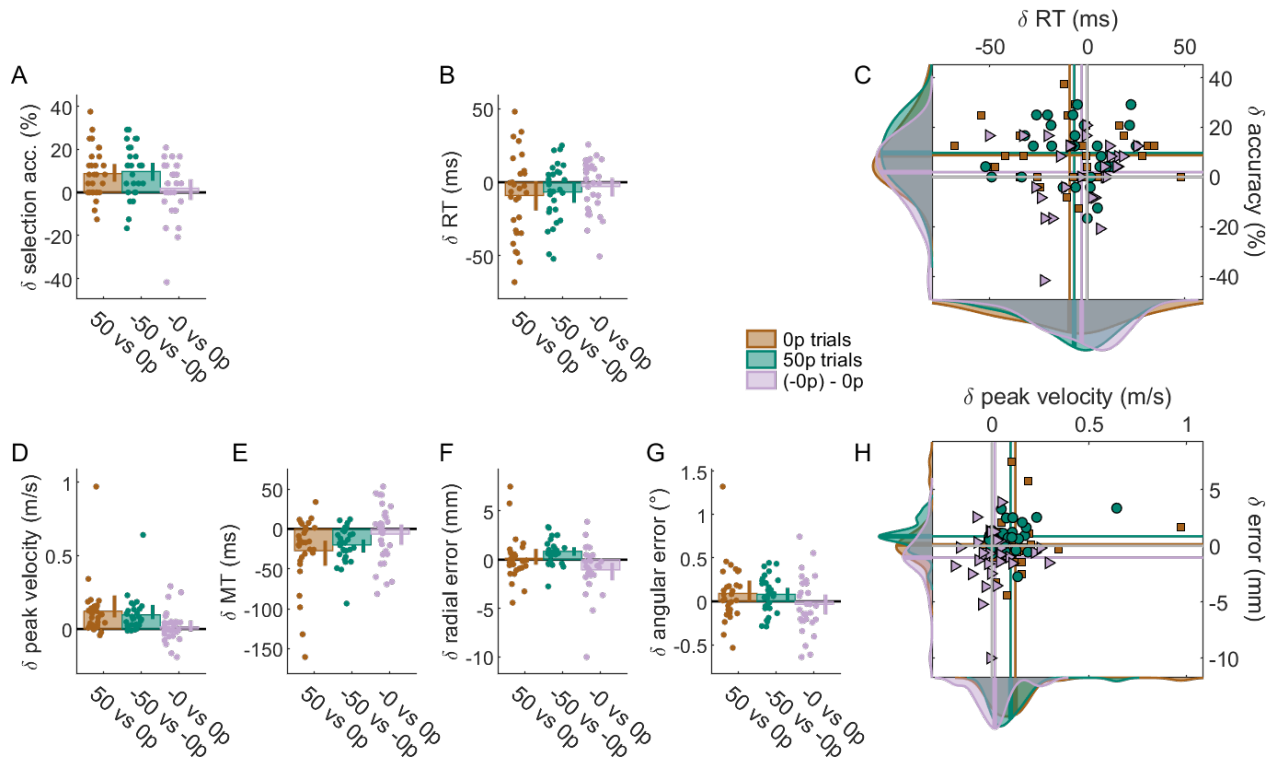

**Figure 5. Reward and punishment have a similar effect on selection, but not on execution.** For all bar plots, data was normalised to baseline performance (0p or -0p) for each individual. Bar height indicates group mean, dots represent individual values and error bars indicate bootstrapped 95% CIs of the mean. A. Selection accuracy. B. Mean reaction times for each participant. C. Scatterplot of mean reaction time against selection accuracy. Values are normalised to 0p trials. The coloured lines indicate mean values for each condition, and the solid grey lines indicate the origin, that is, 0p performance. Data distributions are displayed on the sides, with transversal bars indicating the mean of the distribution. Squares and triangles indicate +50p and (-0p)-0p trials, respectively. D. Mean peak velocity. E. Movement times. F. For radial error, punishment did not protect against an increase in error, while reward did. However, a difference can be observed between the baselines (blue bar). G. Angular error. H. Scatterplot showing execution speed (peak velocity) against execution accuracy (radial error), similar to C.

**Figure 5–Figure supplement 1.** Non-normalised data for all variables in the reward-punishment experiment.

**Figure 5–Figure supplement 2.** Amount of monetary gains and losses in the reward-punishment experiment. Participants earned on average the same amount of money in the rewarded block as they lost during the punishment block (see section Experimental design for details).

173 ( $\beta = 9.72$ , CI = [4.51, 14.9],  $t(116) = 3.70$ ,  $p < 0.001$ ; figure 5A) without any effect on  
 174 reaction times ( $\beta = -0.007$ , CI = [-0.015, 0.002],  $t(116) = -1.53$ ,  $p = 0.13$ ; figure 5B,C) and  
 175 increased peak velocity and decreased movement time (main effect of value on peak velocity

176  $\beta = 0.096$ , CI = [0.045, 0.147],  $t(116) = 3.76$ ,  $p < 0.001$ ; on movement time  $\beta = -0.02$ , CI  
177 = [-0.033, -0.007],  $t(116) = -3.15$ ,  $p = 0.002$ ; figure 5D,E) at no accuracy cost (radial error  
178  $\beta = -0.085$ , CI = [-0.001, 0.171],  $t(116) = 1.96$ ,  $p = 0.052$ ; angular error  $\beta = 0.081$ , CI  
179 = [-0.027, 0.189],  $t(116) = 1.49$ ,  $p = 0.14$ ; figure 5F-H), therefore replicating the findings  
180 from experiment 1. Importantly, context (reward vs. punishment) did not alter these effects  
181 on selection accuracy (main effect of block  $\beta = -1.94$ , CI = [-7.15, 3.26],  $t(116) = -0.74$ ,  $p =$   
182 0.46; interaction  $\beta = -0.97$ , CI = [-8.34, 6.39],  $t(116) = -0.26$ ,  $p = 0.79$ ; figure 5A), reaction  
183 times (main effect of block  $\beta = -0.003$ , CI = [-0.006, 0.011],  $t(116) = -0.66$ ,  $p = 0.51$ ;  
184 interaction  $\beta = -0.002$ , CI = [-0.014, 0.010],  $t(116) = -0.38$ ,  $p = 0.70$ ; figure 5B) or peak  
185 velocity (main effect of block  $\beta = -0.015$ , CI = [-0.066, 0.036],  $t(116) = -0.59$ ,  $p = 0.56$ ;  
186 interaction  $\beta = -0.024$ , CI = [-0.047, 0.096],  $t(116) = -0.67$ ,  $p = 0.50$ ; figure 5D). Finally,  
187 in line with the observed speed-accuracy functions, punishment context did affect radial  
188 accuracy, with accuracy increasing compared to the rewarding context (main effect of block,  
189  $\beta = 0.10$ , CI = [0.019, 0.19],  $t(116) = 2.42$ ,  $p = 0.017$ ; figure 5F), although no interaction was  
190 observed ( $\beta = -0.07$ , CI = [-0.19, 0.05],  $t(116) = -1.16$ ,  $p = 0.25$ ). This can be directly  
191 observed when comparing baseline values, as radial error in the -0p condition was on average  
192 smaller than in the 0p condition (figure 5F, pink plot).

### 193 **2.3 Reward reduces execution error through increased feedback** 194 **correction and late noise resistance**

195 How do reward and punishment lead to these improvements in motor performance? In  
196 saccades, it has been suggested that reward increases feedback control, allowing for more  
197 accurate end-point performance. To test for this possibility, we performed the same time-  
198 time correlation analysis as described in Manohar et al. (2019). Specifically, we assessed how  
199 much the set of positions at time  $t$  across all trials correlated with the set of positions at any  
200 other time  $t \pm n$ , *e.g.*  $t + 1$  or  $t - 5$ . If movements are stereotyped across trials, this correlation

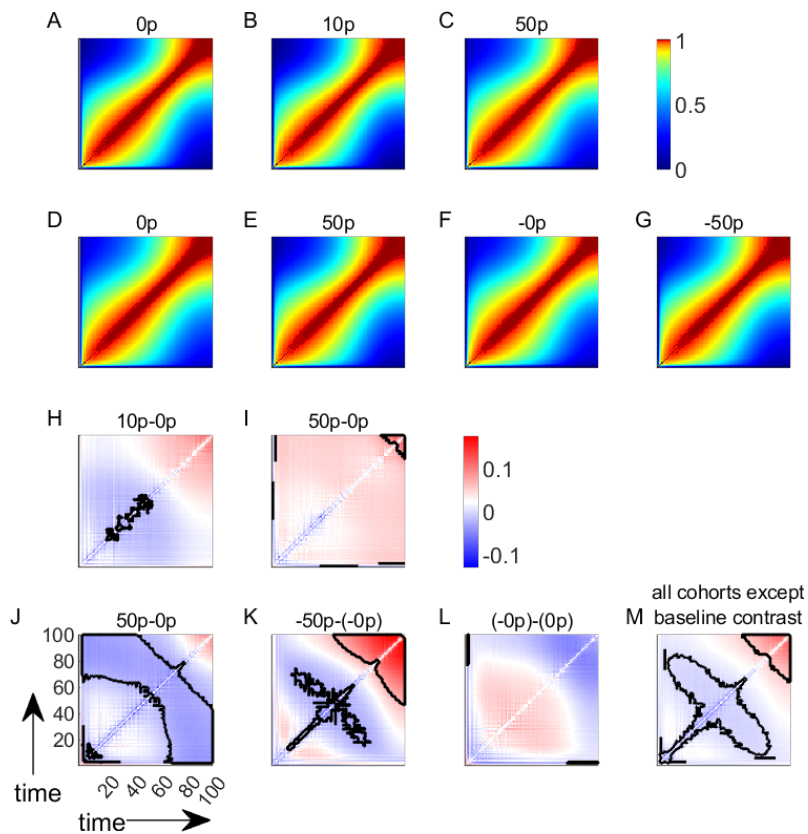

**Figure 6. Time-time correlation maps show that monetary reward and punishment have a biphasic effect on the reach timecourse.** A-C. Time-time correlation maps for all trial types (0p, 10p 50p) in Experiment 1. Colours represent Fisher-transformed Pearson correlation values. For each map, the lower left and upper right corners represent the start and the end of the reaching movement, respectively. Note that the colour maps are non-linear to enhance readability. D-G. Time-time correlation maps for all trial types (0p,50p,-0p,-50p) in Experiment 2. H-I. Comparison of fisher-transformed correlation maps with the respective baseline map (A) for Experiment 1. Clusters of significance after cluster-wise correction for multiple comparisons are indicated by a solid black line. J-L. Similar comparisons for Experiment 2, with each condition's respective baseline (D and F). M. Similar comparison when pooling all contrasts except the baselines contrasts together.

201 will be high because the early position will provide a large amount of information about the  
 202 later or earlier position. On the other hand, if trajectories are variable over time within a trial,  
 203 the correlation will decrease because there will be no consistency in the evolution of position  
 204 over time. Importantly, the latter occurs with high online feedback because corrections are  
 205 not stereotyped, but rather dependent on the random error on a given trial (Manohar et al.,  
 206 2019). If the same mechanism is at play during reaching movements as in saccades, a similar

207 decrease in time-time correlations should be observed.

208 All timepoints correlations were performed by comparing position over trials by centiles,  
209 leading to 100 timepoints along the trajectory (figure 6A-G). Across experiments 1 and 2,  
210 we observed an increase in time-time correlation in the late part of movement both with  
211 reward and punishment (figure 6H-K), although this did not reach significance in the 50p-0p  
212 condition of the second experiment (figure 6J) and was only marginally significant in the  
213 10p-0p condition (figure 6H). In contrast, the early to middle part of movement showed a  
214 clear decorrelation that was significant in three conditions but not in the 50p-0p condition  
215 of the first experiment. Surprisingly, no difference was observed when comparing baseline  
216 trials from experiment 2 (figure 6L), which is at odds with the behavioural observations  
217 that radial error was reduced in the -0p condition compared to 0p (figure 5F). Overall,  
218 although quantitative differences are observed across cohorts, their underlying features are  
219 qualitatively similar (with the exception of the baselines contrast; figure 6L), displaying a  
220 decrease in correlation during movement followed by an increase in correlation at the end of  
221 movement. This suggests that a common mechanism may take place. To assess the global  
222 trend across cohorts, we pooled all cohorts together *a posteriori*, and indeed observed a weak  
223 early decorrelation, followed by a strong increase in correlation late in the movement (figure  
224 6M). Interestingly, this consistent biphasic pattern across conditions and experiments is the  
225 opposite to the one observed in saccades (Manohar et al., 2019). Therefore, this analysis  
226 would suggest that reward/punishment causes a decrease in feedback control during the late  
227 part of reaching movements. However, a reduction in feedback control should result in a  
228 decrease in accuracy which was not observed in our data. A more likely possibility is that  
229 another mechanism is being implemented that enables movements to be performed with  
230 enhanced precision under reward and punishment.

231 One possible candidate is muscle co-contraction. By simultaneously contracting agonist  
232 and antagonist muscles around a given joint, the nervous system is able to regulate the

233 stiffness of that joint. Although this is an extremely energy inefficient mechanism, it has  
234 been repeatedly shown that it is very effective at improving arm stability in the face of  
235 unstable environments such as force fields (Franklin et al., 2003). Critically, it is also capable  
236 of dampening noise (Selen et al., 2009), which arises with faster reaching movements, and  
237 therefore enables more accurate performance (Todorov, 2005). Therefore, it is possible that  
238 increased arm stiffness could, at least partially, underlie the effects of reward and punishment  
239 on motor performance.

## 240 **2.4 Simulation of time-time correlation maps with a simplified dy-** 241 **namical system**

242 To assess if the correlation maps we observed are in line with this interpretation, we performed  
243 simulations using a simplified control system (Manohar et al., 2019) and evaluated how it  
244 responded to hypothesised manipulations of the control system. Let us represent the reach  
245 as a discretised dynamical system (Todorov, 2004):

$$x_{t+1} = \alpha \cdot x_t + \beta \cdot u_t + \mathcal{N}(\mu, \sigma) \quad (1)$$

246 The state of the system at time  $t$  is represented as  $x_t$ , the motor command as  $u_t$ , and  
247 the system is susceptible to a random gaussian process with mean  $\mu = 0$  and variance  
248  $\sigma = 1$ .  $\alpha$  and  $\beta$  represent the environment dynamics and control parameter, respectively.  
249 For simplicity, we initially assume that  $\alpha = 1, \beta = 0$  and that  $x_0 = 0$ . Therefore, any  
250 deviation from 0 is solely due to the noise term that contaminates the system at every time  
251 step.

252 We performed 1000 simulations, each including 1000 timesteps, and show the time-time  
253 correlation maps of the different controllers under consideration. First, we assume that no  
254 feedback has taken place ( $\beta = 0$ , equation 1). The system is therefore only driven by the noise

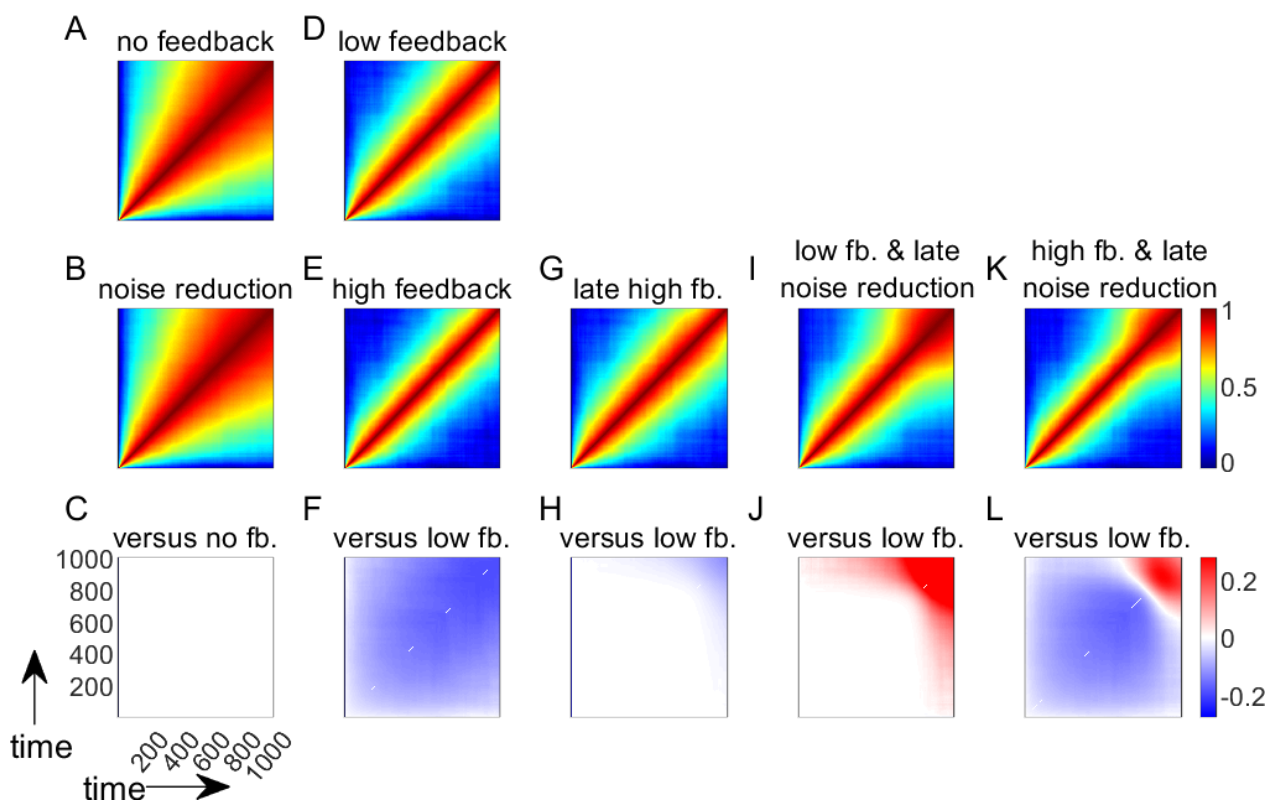

**Figure 7. Simulations of time-time correlation map behaviour under different models of the reward- and punishment-based effects on motor execution.** A,D. Time-time correlation maps of both control models. Colours represent Fisher-transformed Pearson correlation values. For each map, the lower left and upper right corners represent the start and the end of the reaching movement, respectively. B,E,G,I,K. Time-time correlation maps of plausible alternative models. C,F,H,J,L. Comparison of models with their respective baseline models.

**Figure 7–Figure supplement 1.** Simulations with a bell-shaped noise term to introduce signal-dependent noise.

**Figure 7–Figure supplement 2.** Simulations with feedback delay of 400 timesteps.

255 term (figure 7A). The controller can reduce the amount of noise, *e.g.* through an increase  
 256 in stiffness (Selen et al., 2009). This can be represented as  $x_{t+1} = x_t + \gamma \cdot \mathcal{N}(\mu, \sigma)$  with  
 257  $\gamma = 0.5$ . However, this would not alter the correlation map (figure 7B-C) as was previously  
 258 shown (Manohar et al., 2019) because the noise reduction occurs uniformly over time. Now,  
 259 if a feedback term is introduced with  $\beta = -0.002$  and  $u_t = x_t$ , the system includes a control  
 260 term that will counter the noise and becomes:

$$x_{t+1} = x_t - 0.002 \cdot x_t + \mathcal{N}(\mu, \sigma) \quad (2)$$

261 With such a corrective feedback term, the goal of the system becomes to maintain the state  
262 at 0 for the duration of the simulation. This is equivalent to assuming that  $x$  represents error  
263 over time and the controller has perfect knowledge of the optimal movement to be performed.  
264 Higher feedback control ( $\beta = -0.003$ ) would reduce errors even further. Comparing this  
265 high feedback model with the low feedback model (equation 2; figure 7D-E), we see that the  
266 contrast (figure 7F) shows a reduction in time-time correlations similar to what is observed  
267 in the late part of saccades (Manohar et al., 2019) and in the early part of arm reaches in  
268 our dataset (figure 6H-K). Since our dataset displays a biphasic correlation map, it is likely  
269 that two phenomena occur at different timepoints during the reach. To simulate this, we  
270 altered the original model by including a sigmoidal step function  $S(t)$  that is inactive early  
271 on ( $S_0 = 0$ ) and becomes active ( $S_{t_f} = 1$ ) during the late part of the reach (see section Model  
272 simulations for details). This leads to two possible mechanisms, namely, a late increase in  
273 feedback or a late reduction in noise:

$$x_{t+1} = x_t + (-0.002 + \beta \cdot S_{t+1}) \cdot x_t + \mathcal{N}(\mu, \sigma) \quad \beta = -0.001 \quad (3)$$

274

$$x_{t+1} = x_t - 0.002 \cdot x_t + (1 + \gamma \cdot S_{t+1}) \cdot \mathcal{N}(\mu, \sigma) \quad \gamma = -0.5 \quad (4)$$

275 The results show that a late increase in feedback causes decorrelation at the end of movement  
276 (equation 3; figure 7G-H), which is the opposite of what we observe in our results. How-  
277 ever, similar to our behavioural results, a late reduction in noise causes an increase in the  
278 correlation values at the end of movement (equation 4; figure 7I-J). Therefore, our results  
279 (figure 6H-K) appear to be qualitatively similar to a combined model in which reward and  
280 punishment cause a global increase in feedback control and a late reduction in noise (equation  
281 5; figure 7K-L):

$$x_{t+1} = x_t - 0.003 \cdot x_t + (1 - 0.5 \cdot S_{t+1}) \cdot \mathcal{N}(\mu, \sigma) \quad (5)$$



282 The simulations displayed here incorrectly assume that the noise term remains the same  
283 throughout the reach (Shadmehr & Krakauer, 2008; Todorov, 2004) and that feedback can  
284 account for errors from one timestep to the next, that is nearly immediately (Bhushan &  
285 Shadmehr, 1999). To explore if these features would alter our observations, we simulated two  
286 alternative sets of models. A first set included a bell-shaped noise term similar to a reach  
287 with signal-dependent noise under minimum jerk conditions (figure 7 supplement 1), and a  
288 second set included a delay of 400 timesteps in the feedback response (figure 7 supplement  
289 2). Both sets of simulation produced results similar to those observed in the original set of  
290 models.

## 291 **2.5 Quantitative model comparison**

292 To formally test which candidate model best describes our empirical observations, we fitted  
293 each of them to the experimental datasets. Each of the five empirical conditions displayed  
294 in figure 6H-L was kept separate, each condition representing a cohort, and their fit assessed  
295 separately. While individually fitted models present several advantages over group-level ana-  
296 lysis, it has been argued that the most reliable approach to determine the best-fit model is to  
297 assess its performance both on individual and group data and compare the outcomes (Cohen  
298 et al., 2008; Lewandowsky & Farrell, 2011) and we will therefore follow this approach. We  
299 included six candidate models in our analysis: noise reduction (one free parameter  $\gamma$ ; figure  
300 7C), increased feedback (one parameter  $\beta$ ; figure 7E), late feedback (one parameter  $\beta$ ; figure  
301 7H), late noise reduction (one parameter  $\gamma$ ; figure 7J), increased feedback with late noise  
302 reduction (two parameters  $\beta$  and  $\gamma$ ; figure 7L) and an additional model with noise reduction  
303 and a late increase in feedback control (two parameters  $\beta$  and  $\gamma$ ).

304 Individual-level analysis resulted in the increased feedback with late noise reduction model  
305 being selected by a strong majority of participants for each cohort (cohort 1-5:  $\chi^2 = [97.6,$   
306  $76.8, 74.4, 116.8, 83.2]$ , all  $p < 0.001$ , figure 8A), confirming qualitative predictions. The

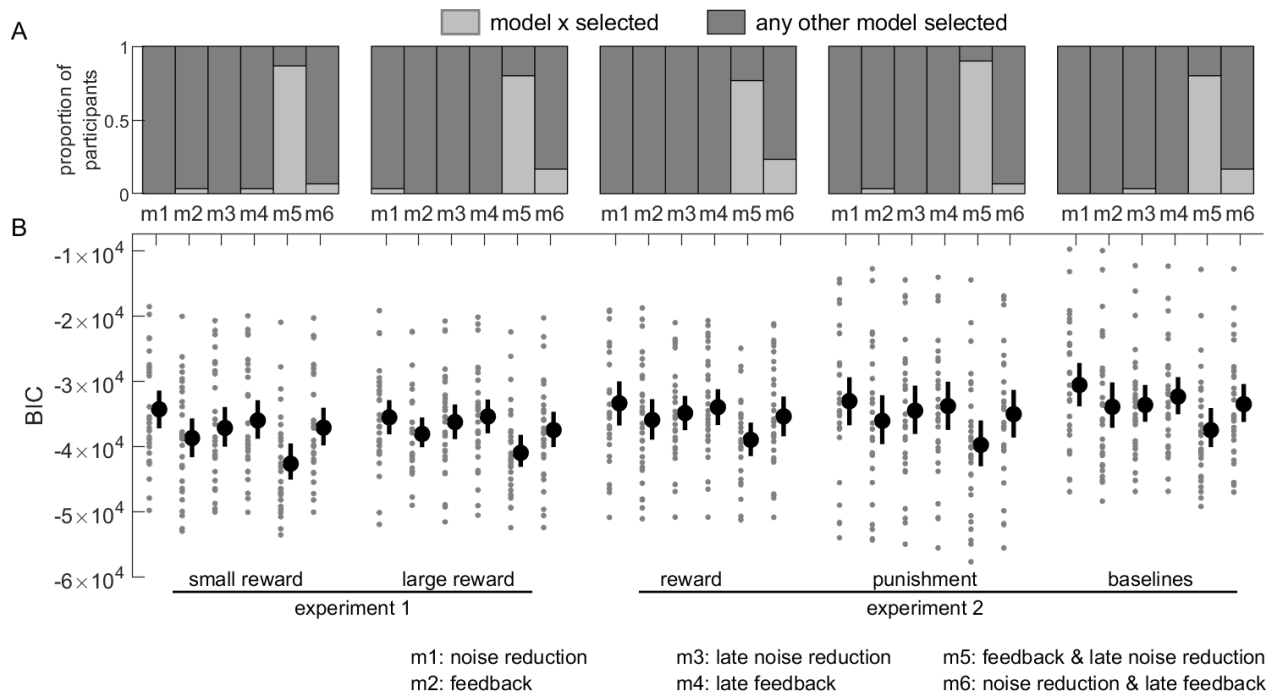

**Figure 8. Model comparisons for individual fits.** A. Proportion of participants whose winning model was the one considered (light gray) against all other models (dark gray) for every cohort. B. Individual and mean BIC values for each participant and each model. Lower BIC values indicate a better fit. Dots indicate individual BICs, the black dot indicates the group mean and the error bars indicate the bootstrapped 95% CIs of the mean. BIC: Bayesian information criterion.

307 best-fit model for each participant was defined as the model bearing the lowest Bayesian  
 308 information criterion (BIC; figure 8B). This allowed us to account for each model’s complexity,  
 309 because the BIC penalises models with more free parameters. Of note, the “baselines” cohort  
 310 displayed the highest BIC for all models considered. However, this should not be surprising,  
 311 considering that this cohort is the only one that showed no significant trend in its contrast  
 312 map (figure 6L). To confirm that the selected model is indeed the most parsimonious choice,  
 313 we compared the individual-level outcome to a group-level outcome. Each candidate model  
 314 was fit to all individual correlation maps at once, thereby allowing for each free parameter  
 315 to take a single value per cohort. This is equivalent to assuming that the parameters are not  
 316 random but rather fixed effects, allowing us to observe the population-level trend with higher  
 317 certainty, though at the cost of ignoring its variability (Cohen et al., 2008; Lewandowsky &

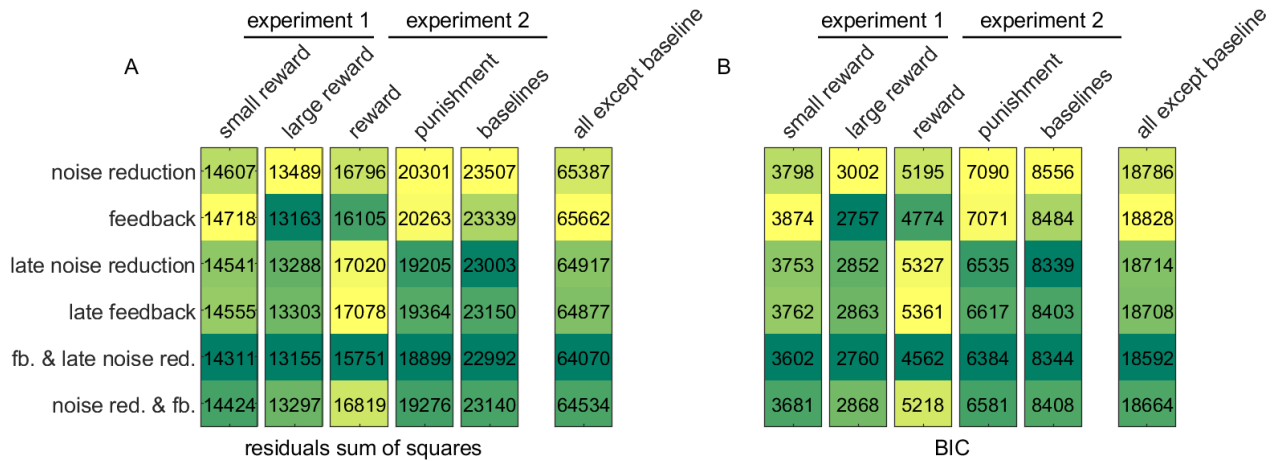

**Figure 9. Model comparisons for group-level fits.** A. residuals sum of squares for each model and cohort. Darker colours indicate lower values. B. Same as A for BIC. fb: feedback; noise red.: noise reduction; BIC: Bayesian information criterion.

318 Farrell, 2011). Again, for every cohort except the baseline cohort, the model with lowest  
 319 residuals sum of squares (figure 9A) and lowest BIC (figure 9B) was the increased feedback  
 320 with late noise reduction model – though the increased feedback model BIC was marginally  
 321 lower for the large-reward cohort ( $\Delta\text{BIC}=4$ ) and therefore was a similarly good fit. Finally,  
 322 fitting all non-baseline cohorts yielded the same result.

323 Comparing group-level and individual-level model comparisons, we observe that the  
 324 same model is consistently selected across all experimental cohorts besides the baselines co-  
 325 hort, corroborating the hypothesis that late noise reduction occurs alongside a global increase  
 326 in feedback control in the presence of reward or punishment. One way to increase noise res-  
 327 istance during a motor task is by increasing joint stiffness, a possibility that we test in the  
 328 following experiment.

## 329 **2.6 The effect of reward on end-point stiffness at the end of the** 330 **reaching movement**

331 Next, we experimentally tested whether the reduction in noise observed in the late part of  
 332 reward trials is associated with an increase in stiffness. For simplicity, we focused on the

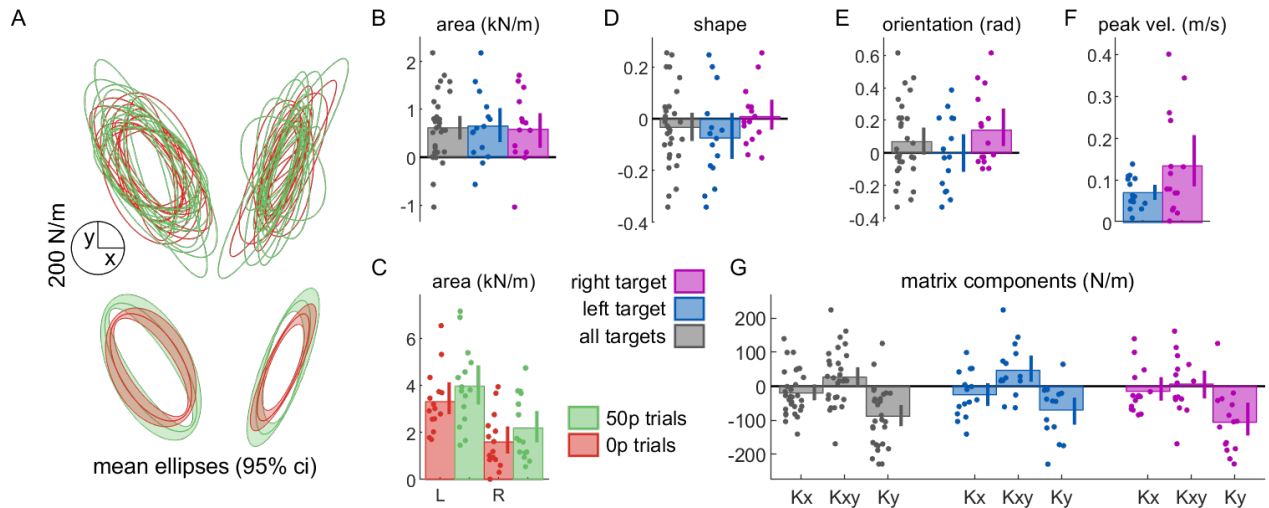

**Figure 10. Reward increases stiffness at the end of movement.** A. Individual (top) and mean (down) stiffness ellipses. Shaded areas around the ellipses represent bootstrapped 95% CIs. Right and left ellipses represent individual ellipses for the right and left target, respectively. B. Ellipses area normalised to 0p trials. Error bars represent bootstrapped 95% CIs. C. Non-normalised area values are also provided to illustrate the difference in absolute area as a function of target (L: left target, R: right target). D. Ellipse shapes normalised to 0p trials. Shapes are defined as the ratio of short to long diameter of the ellipse. E. Ellipse orientation normalised to 0p trials. Orientation is defined as the angle of the ellipse’s long diameter. F. Peak velocity normalised to 0p trials. Peak velocity increased with reward. G. Stiffness matrix elements for 50p trials normalised to the stiffness matrix for 0p trials.

**Figure 10–Figure supplement 1. Displacement profile at the end of the reaching movement.** A. Schematic of the displacement. At the end of the movement, when velocity decreased behind a threshold of 0.3 m/s, a displacement occasionally occurred in one of 8 possible directions. Each direction is represented by a colour. B. Average displacement profile over time for the first participant on the right-hand side target. The upper and lower rows represent variables in the  $x$  and  $y$  dimension, respectively. The two vertical black solid lines demark the limit between the ramp-up and plateau, and plateau and ramp-down phase. Values for each variable were taken as the average over time during the 140-200ms window (grey area), where the displacement is clamped and most stable.

**Figure 10–Figure supplement 2. Mixed-effect model for stiffness area at the end of the reaching movement.**

**Figure 10–Figure supplement 3. Mixed-effect model for stiffness  $K_y$  component at the end of the reaching movement.**

333 reward context only from this point. We recruited another set of participants (N=30) to  
 334 reach towards a single target 20cm away from a central starting position in 0p and 50p con-  
 335 ditions, and employed a well-established experimental approach to measure stiffness (Burdet  
 336 et al., 2000; Selen et al., 2009). Specifically, during occasional “catch” trials (31% trials

337 pseudorandomly interspersed) a fixed-length (8mm) displacement was applied to the robotic  
338 manipulandum immediately as participants stopped within the target. Because displace-  
339 ments of this amplitude were noticeable, participants were instructed to ignore them and  
340 not react, and we employed a low proportion of catch trials to reduce anticipation. The  
341 displacements were in 8 possible directions arrayed radially around the target (figure 10 sup-  
342 plement 1A). This displacement was transient, with a ramp-up, a plateau, and a ramp-down  
343 phase back to the original end-position. As the position was clamped during the plateau  
344 phase, velocity and acceleration were on average null, removing any influence of viscosity  
345 and inertia. Therefore, the amount of force required to maintain the displacement during  
346 plateau was linearly proportional to end-point stiffness of the arm (Perreault et al., 2002).  
347 The displacement profile of a participant is presented in figure 10 supplement 1B. Using a  
348 linear regression approach to fit the average recorded force during the plateau (grey area  
349 in figure 10 supplement 1B) against the displacement direction, we obtained the end-point  
350 stiffness matrices for all participants and all reward values. Stiffness matrices could then be  
351 visualised by plotting ellipses using the following equation:

$$\begin{bmatrix} x \\ y \end{bmatrix} = K \cdot \begin{bmatrix} \cos t \\ \sin t \end{bmatrix} \quad 0 \leq t \leq 2\pi \quad K = \begin{bmatrix} K_{xx} & K_{xy} \\ K_{xy} & K_{yy} \end{bmatrix} \quad (6)$$

352 Because arm stiffness is strongly dependent on arm configuration, stiffness ellipses are  
353 usually oriented, with a long axis indicating a direction of higher stiffness (figure 10). This  
354 orientation is influenced by several factors, including position in Cartesian space (Mussa-  
355 Ivaldi et al., 1985). If reward affects stiffness as we hypothesised, the possibility that this  
356 effect is dependent on a target location must therefore be considered. To account for this,  
357 two groups of participants (N=15 per group) reached for a target 45° to the right or the left  
358 of the starting position.

359 To quantify the global amount of stiffness, we compared the ellipse area across conditions

360 (figure 10A-C). In line with our hypothesis, the area substantially increased in rewarded  
361 trials compared to non-rewarded trials (figure 10A,B). This effect of reward was very con-  
362 sistent across both target positions (figure 10B), even though absolute stiffness was globally  
363 higher for the left target (figure 10C). On the other hand, other ellipse characteristics, such  
364 as shape and orientation (figure 10D,E) showed less sensitivity to reward. However, since  
365 reward also increased average velocity (figure 10F), in line with our previous results, perhaps  
366 this increase in stiffness is a response to higher velocity rather than reward. To avoid this  
367 confound, we fitted a mixed-effect linear model, allowing for individual intercepts and target  
368 position intercept, where variance in area could be explained both by reward and velocity:  
369  $area \sim 1 + reward + peak\ velocity + (1|participant) + (1|target)$ . As expected, reward –  
370 but not peak velocity – could explain the variance in ellipse area (peak velocity:  $p = 0.31$ ;  
371 reward:  $p < 0.001$ ; table in figure 10 supplement 2), confirming that the presence of reward  
372 results in higher global stiffness at the end of the movement. In contrast, fitting a model with  
373 the same explanatory variables to the  $Ky$  component of the stiffness matrices, which showed  
374 the greatest sensitivity to reward compared to the other components (figure 10G) revealed  
375 that not only reward ( $p < 0.001$ , Bonferroni corrected) but also peak velocity ( $p=0.016$ ,  
376 Bonferroni-corrected; table in figure 10 supplement 3) explained the observed variance  
377 (model:  $Ky \sim 1 + reward + peak\ velocity + (1|participant) + (1|target)$ ). In comparison, no  
378 significant effects were found to relate to the  $Kx$  component (reward:  $p = 0.14$ , peak velocity:  
379  $p = 1$ , Bonferroni-corrected;  $Kx \sim 1 + reward + peak\ velocity + (1|participant) + (1|target)$ ).

380 Because interactions with nested elements cannot be compared directly using a mixed-  
381 effect linear model (Schielzeth & Nakagawa, 2013; Zuur et al., 2010; Harrison et al., 2018),  
382 we employed a repeated-measure ANOVA to compare the interaction between reward and  
383 target on stiffness. No interaction between reward and target location were observed on area  
384 ( $F(1) = 0.069, p = 0.79$ , partial  $\eta^2 < 0.001$ ; figure 10A,C).

385 We conclude that end-point stiffness is sensitive to both reward and velocity. However, the

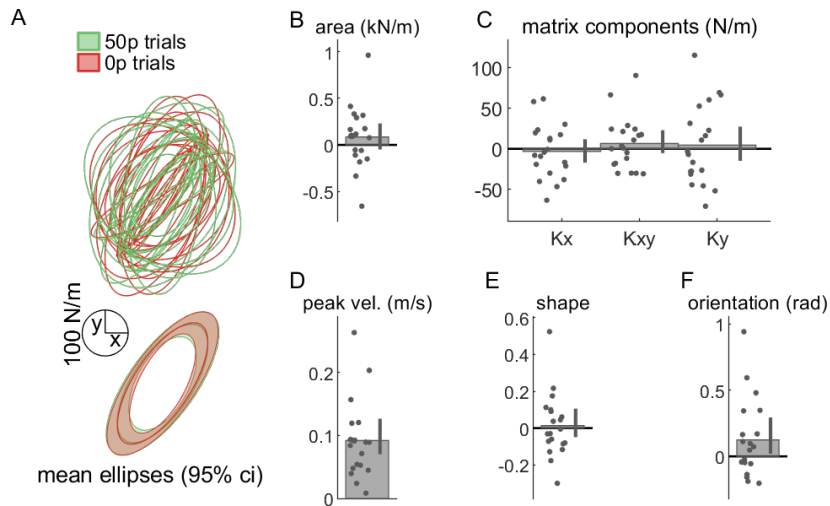

**Figure 11. Reward does not alter stiffness at the start of movement.** Individual (top) and mean (down) stiffness ellipses. Shaded areas around the ellipses represent bootstrapped 95% CIs. Right and left ellipses represent individual ellipses for the right and left target, respectively. B. Ellipses area normalised to 0p trials. Error bars represent bootstrapped 95% CIs. C. Stiffness matrix elements for 50p trials normalised to the stiffness matrix for 0p trials. D. Peak velocity normalised to 0p trials. E. Ellipse shapes normalised to 0p trials. Shapes are defined as the ratio of short to long diameter of the ellipse. F. Ellipse orientation normalised to 0p trials. Orientation is defined as the angle of the ellipse’s long diameter.

**Figure 11–Figure supplement 1. Displacement profile at the start of the reaching movement.** A. Schematic of the displacement. At the start of the movement, a displacement occasionally occurred in one of 8 possible directions. Each direction is represented by a colour. B. Average displacement profile over time for the first participant. The upper and lower rows represent variables in the  $x$  and  $y$  dimension, respectively. The two vertical black solid lines demark the limit between the ramp-up and plateau, and plateau and ramp-down phase. Values for each variable were taken as the average over time during the 140-200ms window (grey area), where the displacement is clamped and most stable.

**Figure 11–Figure supplement 2. Mixed-effect model for stiffness area at the start of the movement.**

**Figure 11–Figure supplement 3. Mixed-effect model for stiffness  $Ky$  component at the start of the movement.**

386 velocity-driven increase in stiffness is specific to the dimension that this velocity is directed  
 387 toward, while the reward-driven increase in stiffness is non-directional, at least in our task.  
 388 This is likely because our task does not distinguish direction of error (*i.e.* error in the  $y$   
 389 dimension is not more punishing than in the  $x$  dimension) and so error must be reduced in  
 390 all dimensions (Selen et al., 2009).

## 391 **2.7 Reward does not alter end-point stiffness at the start of the** 392 **movement**

393 Finally, the time-time correlation maps also suggest that the increase in stiffness should  
394 only occur at the end of the reaching movement, since the early and middle parts show an  
395 opposite effect (decorrelation). Therefore, an increase in end-point stiffness should not be  
396 present immediately before the reach. To test this, participants ( $N=20$ ) reached to 2 targets  
397 positioned 20cm away and  $45^\circ$  to the left and right of the starting position. On occasional  
398 catch trials (31% trials), a displacement akin to the previous experiment occurred in one of  
399 8 possible directions at the time normally corresponding to target onset but after the reward  
400 information had been displayed (figure 11 supplement 1). Because participants voluntarily  
401 moved into the starting position after it appeared, they had sufficient time to process the  
402 reward information. Unlike the previous experiment, reward and velocity in the subsequent  
403 reach had no impact on stiffness, either by area (reward:  $p = 0.35$ ; peak velocity:  $p = 0.75$ ,  
404 table in figure 11 supplement 2) or by the matrix component  $Ky$  (reward:  $p = 0.19$ ; peak  
405 velocity:  $p = 0.45$ , table in figure 11 supplement 3), corroborating our interpretation of the  
406 correlation map (figure 11).

## 407 **3 Discussion**

408 In this study, we demonstrated that reward has the ability to simultaneously improve the  
409 selection and execution components of a reaching movement. Specifically, reward promoted  
410 the selection of the correct action in the presence of distractors, whilst also improving exe-  
411 cution through increased speed and maintenance of accuracy. These results led to a shift in  
412 the speed-accuracy functions for both selection and execution. In addition, punishment had  
413 a similar impact on action selection and execution, although its impact was non-contingent  
414 for execution, in that it enhanced performance across all trials within a block, irrespective of



415 the value of the current trial. Computational analysis revealed that the effect of reward on  
416 execution involved a combination of increased feedback control and noise reduction, which  
417 we then showed was due to an increase in arm stiffness at the end of the reaching movement  
418 – but not at the start of the movement. Overall, we confirm previous observations that  
419 feedback control increases with reward and offer a new error-managing mechanism that the  
420 control system employs under reward: regulation of arm stiffness.

421 Our results add to the previous literature arguing that reward increases execution speed  
422 in reaching (Chen, Holland & Galea, 2018; Pasquereau et al., 2007; Summerside et al., 2018)  
423 and saccades (Manohar et al., 2019, 2015; Takikawa et al., 2002). However, our results  
424 deviate from several reports in some respects. First, in a serial reaction time study, it was  
425 demonstrated that reward and punishment both reduced reaction times in humans (Wachter  
426 et al., 2009), while reaction times are not significantly altered by reward and punishment  
427 in our study. However, serial reaction time tasks strongly emphasise reaction times as a  
428 measure of learning independently of other variables, and interestingly, the authors show  
429 that punishment also led to a non-contingent effect on performance, while reward did not,  
430 similar to our results. A possible interpretation is that the motor system presents a similar  
431 bias to punishment to what is regularly reported in prospect theory and decision-making  
432 literature (??) – a phenomenon dubbed “loss aversion”. Next, radial accuracy has been  
433 shown to improve with reward, both in monkeys (Kojima & Soetedjo, 2017; Takikawa et al.,  
434 2002) and humans (Manohar et al., 2019, 2015), but these studies all focused on saccadic  
435 eye movements. In contrast, one reported case in a reaching task showed improvements in  
436 angular accuracy (Summerside et al., 2018). However, accuracy requirements in their no-  
437 reward condition were minimal, possibly allowing for larger improvements to be expressed  
438 compared to our task, and potentially explaining why we did not observe similar improvement  
439 in radial or angular accuracy. Finally, while other studies have shown that speed-accuracy  
440 functions can shift with practice (Reis et al., 2009; Telgen et al., 2014), it is noteworthy

441 that reward has a capacity to do so in what seems a nearly instantaneous time-scale, that  
442 is, from one trial to the next. Indeed, trials bearing different reward values were randomly  
443 intertwined in our study, meaning that this shift occurs within one trial. In contrast, the  
444 shift in speed-accuracy function observed with motor learning can take hours or even days  
445 to occur (Telgen et al., 2014).

### 446 **3.1 Implications of increased stiffness with reward**

447 While it is well established that stiffness has a beneficial effect on motor performance, our  
448 work provides the first set of evidence that this mechanism is employed in a rewarding context.  
449 Stiffness itself could be regulated through a change in co-contraction of antagonist muscles,  
450 which is a simple but costly method to increase stiffness and enhance performance against  
451 noise (Gribble et al., 2003; Selen et al., 2009; Ueyama & Miyashita, 2013; Ueyama et al.,  
452 2011). The presence of reward may make such cost “worthy” of the associated metabolic  
453 expense (Todorov, 2004), as has been shown in reaching in non-human primates (Ueyama  
454 & Miyashita, 2014). Another possibility is that the stretch reflex is increased, leading to a  
455 stronger counter-acting force produced against the perturbation. For instance, the stretch  
456 reflex is sensitive to cognitive factors such as postural threat (standing next to a significant  
457 height; Horslen et al., 2018). Nevertheless, the contribution of stiffness in reward-based  
458 performance has implications for current lines of research on clinical rehabilitation that focus  
459 on improving rehabilitation procedures using reward (Goodman et al., 2014; Quattrocchi  
460 et al., 2017). While several studies report promising improvements, excessive stiffness may  
461 expose vulnerable clinical populations to increased risk of fatigue and even injury. Careful  
462 monitoring is therefore required to avoid this possibility.

## 463 **3.2 Saccades and reaching movements differ in their utilization of** 464 **stiffness control with reward**

465 Contrary to our findings, previous work on saccades shows that reward had no effect on  
466 stiffness (Manohar et al., 2019). Therefore, our results demonstrate that reaching movements  
467 differ from saccadic control, in that it employs an additional error-managing mechanism. Why  
468 do saccadic and limb control employ dissociable control approaches?

469 A first explanation may be the difference in motor command profile. Saccadic control dis-  
470 plays a remarkably stereotyped temporal pattern of activity, in which the saccade is initiated  
471 by a transient burst of action potentials from the motoneurons innervating the extraocular  
472 muscles (Joshua & Lisberger, 2015; Robinson, 1964). Critically, this burst of activity always  
473 reaches an output frequency close to its maximum nearly instantaneously in an all-or-nothing  
474 fashion (Joshua & Lisberger, 2015; Robinson, 1964), with only marginal variation based on  
475 reward and saccade amplitude (Manohar et al., 2019; Reppert et al., 2015; Robinson, 1964;  
476 Xu-Wilson et al., 2009). In comparison, motor commands triggering reaching movements  
477 present a great diversity of temporal profiles depending on task requirements, and often  
478 do not reach maximum stimulation level. This difference between the two controllers may  
479 result in a difference in the temporal pattern of motor unit recruitment. According to the  
480 size principle (Llewellyn et al., 2010), low-force producing, high-sensitivity motor units are  
481 always recruited first during a movement. However, those motor units are also more noisy  
482 due to their higher sensitivity (Dideriksen et al., 2012). Since saccades always rely on an  
483 all-or-nothing input pattern, all motor units may be quickly recruited, including high-force,  
484 low-sensitivity motor neurons that are normally recruited last. This would drastically re-  
485 duce the production of peripheral noise, thus making co-contraction unnecessary (Dideriksen  
486 et al., 2012). This is in line with previous work showing peripheral noise has a minimal  
487 contribution to overall error in eye movements (Van Gisbergen et al., 1981) compared to

488 internally generated noise (Manohar et al., 2019). Interestingly, evidence of the opposite has  
489 been reported for reaching, suggesting that execution rather than planning noise is dominant  
490 in reaching errors (van Beers et al., 2004). These dissociable activation patterns of motor  
491 commands could potentially explain the differences in error-managing mechanisms between  
492 saccadic control and reaching.

493 A second possibility is that the muscles considered in saccade and reaching have different  
494 size and innervation density. Although eyes muscles are smaller, they are remarkably more  
495 innervated than most peripheral skeletal muscles (Floeter, 2010; Porter et al., 1995) such as  
496 arm muscles recruited for reaching, leading to a greater quantity of motor units. Interestingly,  
497 it has been shown that motor noise arising at the muscle level scales negatively with the  
498 number of motor units in that muscle (Hamilton et al., 2004). This may lead to reduced  
499 levels of execution noise for eye movements compared to reaching movements, making stiffness  
500 regulation less necessary for saccades. However, this falsely assumes that the physiology of  
501 motor units in extraocular muscles is the same as in limb muscles (Buchthal & Schmalbruch,  
502 1980), and so this last interpretation should be considered with care.

### 503 **3.3 Increased feedback control and reward**

504 It is less clear what kind of feedback control may play a role in reward-driven improvements.  
505 Feedback control encompasses several processes that share the aim of tracking of deviation  
506 from a motor plan to correct for it, with varying amount of delay to allow for travelling  
507 from the peripheral sensory receptors to the brain. This includes the spinal stretch reflex  
508 (~25ms delay; Weiler et al., 2019), transcortical feedback (~50ms; Pruszynski et al., 2011)  
509 and visual feedback (~170ms for fast involuntary visual feedback responses; Carroll et al.,  
510 2019). While spinal stretch reflex is extremely fast, it is difficult to assume an effect of reward  
511 or motivation occurring at the spinal level. On the other hand, transcortical feedback includes  
512 primary motor cortex processing (Pruszynski et al., 2011), a structure that shows sensitivity

513 to reward (Bundt et al., 2016; Galaro et al., 2019; Thabit et al., 2011). Consequently, an  
514 exciting possibility for future research is that transcortical feedback gain is directly enhanced  
515 by the presence of reward. Indirect evidence suggests that this may be the case, as feedback  
516 control of matching timescales is sensitive to urgency in reaching (Crevecoeur et al., 2013).  
517 This suggests that transcortical feedback gains can also be pre-computed before movement  
518 initiation to meet task demands. Finally, recent work shows that reward can indeed modulate  
519 visual feedback control in reaching (Carroll et al., 2019) at timescales of 170-220ms after  
520 movement onset, much faster than usually considered for this type of feedback control (Carroll  
521 et al., 2019; Kasuga et al., 2015). Despite this remarkable speed, considering our typical  
522 movement times, this would imply that feedback control is increased only after about half  
523 of the movement. Therefore, a more conservative possibility is that both transcortical and  
524 visual feedback gains increase in the presence of reward, though the former remains to be  
525 proved empirically.

526 In saccades, it has been shown that the feedback controller that underlies reward-driven  
527 improvements is located further upstream, at the movement computation stage. Indeed,  
528 although saccadic control is ballistic and therefore feedforward, the cerebellum can provide  
529 some form of feedback to adjust the end part of a saccade trajectory based on errors in  
530 the forward model prediction (Robinson, 1981; Chen-Harris et al., 2008; Frens & Donchin,  
531 2009). More recently, Manohar et al. (2019) demonstrate that it is this feedback loop that  
532 accounts for the observed improvements in feedback control during saccades. Interestingly,  
533 evidence in humans show that cerebellar forward models do contribute to feedback control in  
534 reaching to compensate for sensory delays (Miall et al., 2007), and more recently, optogenetics  
535 manipulation in mice confirmed its involvement in enhancing end-point precision based on  
536 reaching kinematics (Becker & Person, 2019). Therefore, it is possible that reward also  
537 enhances this feedback loop, though this would only contribute to reducing noise arising  
538 at the higher, computational stage rather than at effector stage (Manohar et al., 2019).

539 Furthermore, it should be noted that both in saccadic and reaching tasks, empirical evidence  
540 shows this form of feedback contributes exclusively during the last portion of the movement,  
541 which is in contradiction with what we observe here.

### 542 **3.4 Limitations of the model**

543 The model we employ presents several assumptions and limitations. First, it reduces the  
544 movement to errors over time, because it only deals with the deviation from zero. This is  
545 similar to assuming that a perfect knowledge of the movement to be performed is already ac-  
546 quired, because deviations are only a function of the noise term. Furthermore, since the model  
547 is concerned with maintaining the system at a given value rather than “travelling” to a novel  
548 position, the expected bell-shaped profile of motor commands (Shadmehr & Krakauer, 2008;  
549 Todorov, 2004) is abstracted away, and thus the noise term is not signal-dependent (Todorov,  
550 2005). However, additional simulations show that adding a bell-shaped noise term does not  
551 qualitatively alter the observations of the original set of models. Furthermore, these simpli-  
552 fications can be overlooked when considering model selection, because it is only concerned  
553 about a directional change from an arbitrary control model (*i.e.* increase versus decrease  
554 in time-time correlation). However, it may impede reliable parameter estimation because it  
555 remains an abstraction that excludes particular features such as two-dimensional reaches or  
556 signal-dependent noise. Finally, noise can arise from different sources (*e.g.* planning noise,  
557 execution noise and sensory noise) with a different impact on the final reaching behaviour  
558 measured (Dhawale et al., 2017). Future work using simulations based on a more complete  
559 model of the arm may provide further information regarding the evolution of saccadic and  
560 reaching profiles over time and allow reliable parameter estimation.

## 561 **3.5 Conclusion**

562 In this study, we show that reward can improve the selection and execution components of  
563 reaching movement simultaneously. While we confirm previous suggestions that enhanced  
564 feedback control contributes to this improvement, we introduce a novel, peripheral rather than  
565 central mechanism by showing that global end-point stiffness is regulated by the monetary  
566 value of a given trial. Therefore, reward drives multiple error-reduction mechanisms which  
567 enable individuals to invigorate motor performance without compromising accuracy.

## 568 **4 Methods**

### 569 **4.1 Participants**

570 30 participants (2 males, median age: 19, range: 18-31) took part in experiment 1. 30 parti-  
571 cipants (4 males, median age: 20.5, range: 18-30) took part in experiment 2. 30 participants  
572 (10 male, median age: 19.5, range: 18-32) took part in experiment 3, randomly divided into  
573 two groups of 15. 20 participants (2 male, median age: 19, range: 18-20) took part in exper-  
574 iment 4. All participants were recruited on a voluntary basis and were rewarded with money  
575 (£7.5/h) or research credits depending on their choice. Participants were all free of visual  
576 (including colour discrimination), psychological or motor impairments. All the experiments  
577 were conducted in accordance with the local research ethics committee of the University of  
578 Birmingham, UK.

### 579 **4.2 Task design**

580 Participants performed the task on an end-point KINARM (BKIN Technologies, Ontario,  
581 Canada). They held a robotic handle that could move freely on a plane surface in front of  
582 them, with the handle and their hand hidden by a panel (figure 1A). The panel included a

583 mirror that reflected a screen above it, and participants performed the task by looking at the  
584 reflection of the screen, which appeared at the level of the hidden hand. The sampling rate  
585 was 1kHz.

586 Each trial started with the robot handle bringing participants 4cm in front of a fixed  
587 starting position, except for experiments 3-4 to avoid interference with the perturbations  
588 during catch trials. A 2cm diameter starting position (angular size  $\sim 3.15^\circ$ ) then appeared,  
589 bearing a colour that matched one of several possible reward values, depending on the exper-  
590 iment. The reward value was also displayed in 2cm-height text (angular size  $\sim 3.19^\circ$ ) under  
591 the starting position (figure 1C-D). Because colour luminance can affect salience and there-  
592 fore detectability, luminance-adjusted colours were employed (see <http://www.hs-luv.org/>).  
593 The colours employed were, in red-green-blue format, [76,133,50] (green), [217,54,104] (pink)  
594 and [59,125,171] (blue) for 0, 10 and 50p, respectively, and distractor colours were either  
595 green, pink or blue. To ensure that a specific colour did not bias the amount of distracted  
596 trials, we fitted a mixed-effect model  $distracted \sim colour + (1|participant) + (1|reward)$  with  
597 *colour* a 3-level categorical variable encoding the colour of the distractor target. Distractor  
598 colour did not explain any variance in selection error ( $p = 1.72 \times 10^{-69}$ ,  $p = 0.46$  and  $p = 0.82$   
599 for the intercept, pink and blue colours, respectively) confirming that the observed effect was  
600 not driven by distractor colours. From 500 to 700ms after participants entered the starting  
601 position (on average  $587 \pm 354$ ms after the starting position appeared), a 2cm target (angular  
602 size  $\sim 2.48^\circ$ ) appeared 20cm away from the starting position, bearing the same colour as the  
603 starting position. Participants were instructed to move as fast as they could towards it and  
604 stop in it. They were informed that a combination of their reaction time and movement time  
605 defined how much money they would receive, and that this amount accumulated across the  
606 experiment. They were also informed that end-position was not factored in as long as they  
607 were within 4cm of the target centre.

608 The reward function was a close-loop design that incorporated the recent history of per-



609 formance, to ensure that participants received similar amounts of reward, and that the task  
610 remained consistently challenging over the experiment (Manohar et al., 2015; Reppert et al.,  
611 2018). To that end, the reward function was defined as:

$$r_t = r_{max} \cdot \max\left(1 - e^{\left(\frac{MTRT - \tau_2}{\tau_1}\right)}, 0\right) \quad (7)$$

612 where  $r_{max}$  was the maximum reward value for a given trial,  $MTRT$  the sum of reaction  
613 time and movement time, and  $\tau_1$  and  $\tau_2$  adaptable parameters varying as a function of  
614 performance (figure 1B). Specifically,  $\tau_1$  and  $\tau_2$  were the median of the last 20 trials' 3-4th  
615 and 16-17th fastest MTRTs, respectively, and were initialised as 400 and 800ms at the start  
616 of each participant training block.  $\tau$  values were constrained so that  $\tau_1 < \tau_2 < 900$  is always  
617 true. In practice, all reward values were rounded up (or down in the punishment condition  
618 of experiment 2) to the next penny so that only integer penny values would be displayed.

619 Targets were always of the same colour as the starting position (figure 1C). However,  
620 in experiments 1-2, occasional distractor targets appeared, bearing a different colour than  
621 the starting position (green, pink or blue depending on the correct target's colour; figure  
622 1D). Participants were informed to ignore these targets and wait for the second target to  
623 appear. Failure to comply in rewarded and punished trials resulted in no gains for this trial  
624 and an increase in loss by a factor of 1.2, respectively. The first target (distractor or not)  
625 appeared 500-700ms after entering the starting position using a uniform random distribution,  
626 and correct targets in distractor trials appeared 300-600ms after the distractor target using  
627 the same distribution.

628 When reaching movement velocity passed below a 0.3 m/s threshold, the end position was  
629 recorded, and monetary gains were indicated at the centre of the workspace. After 500ms,  
630 the robotic arm then brought the participant's hand back to the initial position 4cm before  
631 the starting position.

632 In every experiment, participants were first exposed to a training block, where all targets  
633 had the same reward value equal to the mean of all value combinations used later in the  
634 experiment (*e.g.* if the experiment had 0p and 50p trials, the training reward amounted to  
635 25p per trial). Participants were informed that money obtained during the training will not  
636 count toward the final amount they would receive. Starting position and target colours were  
637 all grey during training. The  $\tau$  values obtained at the end of training were then used as  
638 initial values for the actual task.

## 639 **4.3 Experimental design**

### 640 **4.3.1 Experiment 1: reward-magnitude**

641 There were 4 possible target locations positioned every 45° around the midline of the work-  
642 space, resulting in a 135° span (figure 1A). Participants first practiced the task in a 48-trial  
643 training block. They then experienced a short block (24 trials) with no distractors, and then  
644 a main block of 168 trials (72 distractors, 42.86%). Trials were randomly shuffled within each  
645 block. Reward values used during the task were 0, 10 and 50p.

### 646 **4.3.2 Experiment 2: reward-punishment**

647 The same 4 target positions were used as experiment 1, and participants first practiced the  
648 task in a 48 trials training block. Participants then performed a no-distractor block and a  
649 distractor block (12 and 112 trials) in a rewarded condition (0p and 50p trials) and then in a  
650 punishment condition (-0p and -50p trials), in a counterbalanced fashion across participants.  
651 In the distractor blocks, 48 trials were distractor trials (42.86%). Before the punishment  
652 blocks, participants were told that they would start with £11 and that the slower they  
653 moved, the more money they lost. This resulted in participants gaining on average a similar  
654 amount of money on the reward and punishment blocks. They were also informed that if

655 they missed the target or went to the distractor target, their losses on that trial would be  
656 multiplied by a factor of 1.2. The reward function was biased so that:

$$r_t = -r_{max} \cdot \max\left(1 - e^{\left(\frac{MTRT - \tau_2 + a}{\tau_1 + b}\right)}, 0\right) \quad (8)$$

657 With  $a = 268.5$  and  $b = -71.4$ . The update rule was also altered, with  $\tau_1$  and  $\tau_2$  the  
658 median of the last 20 trials' 15-16th and 17-18th fastest MTRTs, respectively. These changes  
659 were obtained by fitting the performance data of the reward-magnitude experiment to a  
660 punishment function with free  $a$  and  $b$  parameters and free updating indexes to minimise the  
661 difference in average losses compared to the average gains observed in the reward-magnitude  
662 experiment. On average, participants gained £5.40 in the reward condition and lost £5.63  
663 in the punishment condition (paired t-test:  $t(29) = -0.55, p = 0.58, d = -0.1$ ; figure 5  
664 supplement 2).

### 665 4.3.3 Experiment 3: end-reach stiffness

666 In this task, each of two groups reached to a target located 20cm from the starting position,  
667 at  $+45$  and  $-45^\circ$  from the midline for the first and second group, respectively. On occasional  
668 catch trials, when movement velocity passed under a 0.3m/s threshold, a 300ms-long, 8mm  
669 displacement pushed participants away from their starting position and back, allowing us  
670 to measure end-point stiffness (see section Data analysis and figure 10 supplement 1). No  
671 distractor trials were employed in this experiment.

672 Participants performed two training sessions, one with no catch trials (25 trials) and one  
673 with 4 catch trials out of 8 trials, in four possible directions from 0 to  $270^\circ$  around the end  
674 position to familiarise participants with the displacement. Participants then performed the  
675 main block with 64 catch trials out of 200 trials (32%) and 0p and 50p reward values. During  
676 the main block, displacements were in 1 of 8 randomly assigned directions from 0- $315^\circ$  around

677 the end-position (figure 10 supplement 1A). We used sessions of 233 trials to ensure session  
678 durations remained short, ruling out any effect of fatigue on stiffness as co-contraction is  
679 metabolically taxing. To ensure that any measure of stiffness was not due to differences in  
680 grip position or a loose finger grip, participant’s hands were restricted with a solid plastic  
681 piece which held the wrist straight and a reinforced glove that securely strapped the fingers  
682 around the handle during the entire task.

#### 683 **4.3.4 Experiment 4: start-reach stiffness**

684 The experiment was identical to experiment 3, except that the catch trials occurred in the  
685 start position (figure 11 supplement 1A) at the time the target was supposed to appear.  
686 To ensure participants remained in the starting position, two different targets ( $\pm 45^\circ$  from  
687 midline) were used to maintain directional uncertainty. Participants had 24 trials during the  
688 no-catch-trial training, 16 trials during the catch-trial training (8 catch trials), and 200 trials  
689 during the main block, with 64 (32%) catch trials. Displacements always occurred 500ms  
690 after entering the starting position, to avoid a jitter-induced bias in stiffness measurement.  
691 In non-catch trials, targets also appeared after a fixed delay of 500ms.

## 692 **4.4 Data analysis**

693 All the analysis code is available on the *Open Science Framework* website, alongside the ex-  
694 perimental datasets at <https://osf.io/7as8g/>. Analyses were all made in Matlab (Math-  
695 works, Natick, MA) using custom-made scripts and functions.

696 Trials were manually classified as distracted or non-distracted. Trials that did not include  
697 a distractor target were all considered non-distracted. Distracted trials were defined as trials  
698 where a distractor target was displayed, and participants initiated their movement (*i.e.* exited  
699 the starting position) toward the distractor instead of the correct target. If participants  
700 readjusted their reach “mid-flight” to the correct target or initiated their movement to the

701 right target and readjusted their reach to the distractor, this was still considered a distracted  
702 trial. On very rare occasions (<20 trials in the whole study), participants exited the starting  
703 position away from the distractor but before the correct target appeared; these trials were  
704 not considered distracted.

705 Reaction times were measured as the time between the correct target onset and when  
706 the participant's distance from the centre of the starting position exceeded 2cm. In trials  
707 that were marked as "distracted" (*i.e.* participant initially went to the distractor target), the  
708 distractor target onset was used. In distractor-bearing trials, the second target did not require  
709 any selection process to be made, as the appearance of the distractor informed participants  
710 that the next target would be the right one. For this reason, reaction times were biased  
711 toward a faster range in trials in which a distractor target appeared, but participants were  
712 not distracted by it. Consequently, mean reaction times were obtained by including only  
713 trials with no distractor, and trials with a distractor in which participants were distracted.  
714 For the same reason, trials in the first block were not included because no distractor was  
715 present, and no selection was necessary. For every other summary variable, we included all  
716 trials that were not distracted trials, including those in the first block.

717 In experiments 1-2, we removed trials with reaction times higher than 1000ms or less than  
718 200ms, and for non-distracted trials we also removed trials with radial errors higher than  
719 6cm or angular errors higher than 20°. Overall, this resulted in 0.3% and 0.7% trials being  
720 removed from experiment 1 and 2, respectively. Speed-accuracy functions were obtained  
721 for each participant by binning data in the  $x$ -dimension into 50 quantiles and averaging  
722 all  $y$ -dimension values in a  $x$ -dimension sliding window of a 30-centile width (Manohar et  
723 al., 2015). Then, each individual speed-accuracy function was averaged by quantile across  
724 participants in both the  $x$  and  $y$  dimension.

725 Time-time correlation analyses were performed exclusively on non-distracted trials. Tra-  
726 jectories were taken from exiting the starting position to when velocity fell below 0.1m/s.

727 They were rotated so that the target appeared directly in front of the starting position, and  
728  $y$ -dimension positions were then linearly interpolated to a hundred evenly spaced timepoints.  
729 We focused on the  $y$  dimensions because it displays most of the variance (figure 12). Correl-  
730 ation values were obtained on  $y$ -positions and fisher-transformed before follow-up analyses  
731 (Manohar et al., 2019).

732 For experiments 3-4, positions and servo forces in the  $x$  and  $y$  dimensions between 140-  
733 200ms after perturbation onset were averaged over time for each catch trial (Franklin et  
734 al., 2003; Selen et al., 2009). Then, the stiffness values were obtained using multiple linear  
735 regressions (function *fitlm* in Matlab). Specifically, for each participant,  $K_{xx}$  and  $K_{xy}^a$  were  
736 the resulting  $x$  and  $y$  coefficients of  $F_x \sim 1 + x + y$  and  $K_{yx}^a$  and  $K_{yy}$  were the resulting  $x$   
737 and  $y$  coefficients of  $F_y \sim 1 + X + Y$ . Data points whose residual was more than 3 times  
738 the standard error of all residuals were excluded (1.56% and 2.27% for experiment 3 and 4,  
739 respectively). Then, we can define the asymmetrical stiffness matrix:

$$K_a = \begin{bmatrix} K_{xx} & K_{xy}^a \\ K_{yx}^a & K_{yy} \end{bmatrix} \quad (9)$$

740 And the symmetrical stiffness matrix that we will use in subsequent analysis:

$$K = \begin{bmatrix} K_{xx} & \frac{K_{xy}^a + K_{yx}^a}{2} \\ \frac{K_{xy}^a + K_{yx}^a}{2} & K_{yy} \end{bmatrix} = \begin{bmatrix} K_{xx} & K_{xy} \\ K_{xy} & K_{yy} \end{bmatrix} \quad (10)$$

741 These matrices can be projected in Cartesian space using a sinusoidal transform (equation  
742 6), resulting in an ellipse. This ellipse can be characterised by its shape, orientation and  
743 ratio, which we obtained using a previously described method (Perreault et al., 2002).

## 744 4.5 Statistical analysis

745 Although for most experiments we employed mixed-effect linear models to allow for individual  
746 intercepts, we used a repeated-measure ANOVA in experiment 1 to compare each reward  
747 magnitudes against each other independently. This allowed us to assess the effect of reward  
748 without assuming a magnitude-scaled effect in the first place. Paired-sample t-tests were  
749 used when one-way repeated-measure ANOVA reported significant effects, and effect sizes  
750 were obtained using partial  $\eta^2$  and the Cohen's d method. For experiment 2, we used mixed-  
751 effect linear models. For experiments 3 and 4, mixed-effect linear models were also used to  
752 account for a possible confound between reward and peak velocity in stiffness regulation, while  
753 accounting for individual differences in speed using individual intercepts. Since experiment  
754 3 included a nested design (*i.e.* participants were assigned either to the right or left target  
755 but not both), we tested for an interaction using a two-way mixed-effect ANOVA to avoid  
756 an artificial inflation of p-values (Zuur, 2009). For all ANOVA, Bonferroni corrections were  
757 applied where appropriate, and post-hoc paired-sample t-tests were used if ANOVA produced  
758 significant results. Bootstrapped 95% confidence interval of the mean were also obtained and  
759 plotted for every group.

760 Since trials consisted of straight movements toward the target, we considered position  
761 in the  $y$  dimension – *i.e.* radial distance from the starting position – to obtain time-time  
762 correlation maps because it expresses most of the variability. To confirm this, reach tra-  
763 jectories were rotated so the target was always located directly in front, and error distribu-  
764 tion in the  $x$  and  $y$  dimension was compared for both experiment 1 (figure 12A-B) and 2  
765 (figure 12C-D). The  $y$  dimension indeed displayed a larger spread in error (experiment 1:  
766  $t(11156) = -16.15, p < 0.001, d = -0.31$ ; experiment 2:  $t(14852) = -13.68, p < 0.001, d =$   
767  $-0.22$ ). Time-time correlation maps were analysed by fitting a mixed-linear model for each  
768 timepoint (Manohar et al., 2019; Zuur, 2009) allowing for individual intercepts using the  
769 model  $z \sim reward + (1|participant)$ , with  $z$  the fisher-transformed Pearson coefficient  $\rho$  for

770 that timepoint. Then clusters of significance, defined as timepoints with p-values for reward  
771 of less than 0.05, were corrected for multiple comparisons using a cluster-wise correction and  
772 10,000 permutations (Maris & Oostenveld, 2007; Nichols & Holmes, 2002). This approach  
773 avoids unnecessarily stringent corrections such as Bonferroni correction by taking advantage  
774 of the spatial organisation of the time-time correlation maps (Maris & Oostenveld, 2007;  
775 Nichols & Holmes, 2002).

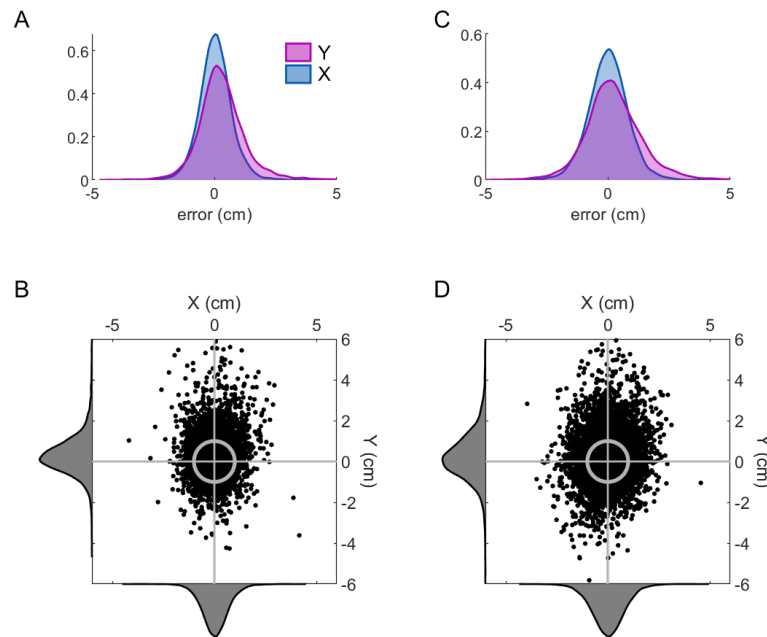

**Figure 12. Distribution of errors at the end of the reach in the  $x$  and  $y$  dimension.**  
A. Density function of errors in the  $x$  and  $y$  dimensions for experiment 1. B. Scatterplot of  $x$  versus  $y$  error after rotation of all target locations to a frontal location. The horizontal and vertical grey lines indicate the centre of the target, and the circle indicates its size. Density distributions can be observed on the sides. C-D. Same as A-B for experiment 2.

## 776 4.6 Model simulations

777 The simulation code is available online on the *Open Science Framework* URL provided above.  
778 Simulation results were obtained by running 1000 simulations and obtaining time-time correl-  
779 ation values across those simulations. The sigmoidal step function  $S(t)$  used for simulations



780 of the late component was a Gaussian cumulative distribution function such as:

$$S(t) = \frac{1}{\sigma \cdot \sqrt{2\pi}} \int_{-\infty}^t e^{-\frac{(x-\mu)^2}{2\sigma^2}} dx \quad (11)$$

781 with  $\sigma = 0.5, \mu = 0.8$  (or 800 for a 1000 timesteps simulation) and  $t_0 < t < t_f$  is the  
782 simulation timestep. It should be noted that the use of a sigmoidal function is arbitrary  
783 and may be replaced by any other step function, though this will only alter the simulation  
784 outcomes quantitatively rather than qualitatively. Values of the feedback control term are  
785 taken from Manohar et al. (2019). On the other hand, different noise terms were taken for our  
786 simulations because previous work only manipulated one parameter per comparison, whereas  
787 we manipulated both noise and feedback at the same time in several models (equations 4  
788 and 5) and the model is more sensitive to feedback control manipulation than to noise term  
789 manipulation.

790 Two alternative sets of models were used to assess the effect of signal-dependent noise  
791 and delay in feedback corrections, respectively. For the first set, the noise term was redefined  
792 as  $\mathcal{N}(\mu, \sigma(t))$  with:

$$\sigma(t) = 16 \cdot \left(\frac{t}{t_f}\right)^2 - 32 \cdot \left(\frac{t}{t_f}\right)^3 + 16 \cdot \left(\frac{t}{t_f}\right)^4 + 0.5 \quad (12)$$

793 with equation 12 being proportional to the velocity profile of a minimum jerk reaching move-  
794 ment (Flash & Hogan, 1985). Here, the equation was adjusted so that  $0.5 \leq \sigma(t) \leq 1.5$ ,  
795  $\sigma(0) = \sigma(t_f) = 0.5$  and  $\sigma(t_f/2) = 1.5$ . The second set of models included a delay in feedback  
796 corrections, so that the feedback term  $\beta \cdot x_t$  and its equivalent in different model variations  
797 became  $\beta \cdot x_{t-399}$ . A four hundred timesteps delay was chosen because observed movement  
798 times in the reward-magnitude and reward-punishment experiments were on average between  
799 350-400ms (figure 3 supplement 1E and figure 5 supplement 1E), resulting in a feedback delay  
800 of  $\sim 350 \times 400/1000 = 140$ ms, which is within the range of feedback control delays expressed

801 during reaching tasks (Pruszynski et al., 2011; Carroll et al., 2019).

802 Regarding model selection, comparisons were performed by fitting each of five datasets  
803 to six candidate models:

$$x_{t+1} = x_t + \gamma \cdot \mathcal{N}(\mu, \sigma) \quad (13)$$

804

$$x_{t+1} = x_t + \beta \cdot x_t + \mathcal{N}(\mu, \sigma) \quad (14)$$

805

$$x_{t+1} = x_t - 0.002 x_t + (1 + \gamma \cdot S_{t+1}) \cdot \mathcal{N}(\mu, \sigma) \quad (15)$$

806

$$x_{t+1} = x_t + (-0.002 + \beta \cdot S_{t+1}) \cdot x_t + \mathcal{N}(\mu, \sigma) \quad (16)$$

807

$$x_{t+1} = x_t + (-0.002 + \beta) \cdot x_t + (1 + \gamma \cdot S_{t+1}) \cdot \mathcal{N}(\mu, \sigma) \quad (17)$$

808

$$x_{t+1} = x_t + (-0.002 + \beta \cdot S_{t+1}) \cdot x_t + (1 + \gamma) \cdot \mathcal{N}(\mu, \sigma) \quad (18)$$

809 with equation 13 representing a model with noise reduction, equation 14 a model with in-  
810 creased feedback control, equation 15 a model with late noise reduction, equation 16 a model  
811 with late increase in feedback control, equation 17 a model with increased feedback and late  
812 noise reduction and equation 18 a model with late noise reduction and increased feedback.

813 The free parameters were  $\beta$  and  $\gamma$ , with the last two model including both of them and all  
814 the others including one, according to the equations.  $S(t)$  was a step function as indicated  
815 in equation 11 and was fixed. 1000 simulations were done with 100 timesteps per simulation.

816 Time-time correlation maps were then fisher-transformed and subtracted to a control model  
817  $x_{t+1} = x_t + \mathcal{N}(\mu, \sigma)$  for equation 13 and  $x_{t+1} = x_t - 0.002 \cdot x_t + \mathcal{N}(\mu, \sigma)$  for all other models to  
818 obtain contrast maps. The resulting contrast maps were then fitted to the empirical contrast  
819 maps obtained to minimise the sums of squared errors for each individual for individual-level  
820 analysis, and across individuals for the group-level analysis. Of note, rather than fitting  
821 the model to the across-participant averaged contrast map in the group-level analysis, the  
822 model minimised all the individual maps at once, allowing for a single model fit for the group

823 without averaging away individual map features. The optimisation process was done using  
824 the *fminsearch* function of the *Optimization* toolbox in Matlab. The free parameter search  
825 was initialised with  $\beta_0 = 0$  and  $\gamma_0 = 0$ . Model comparisons were performed by finding the  
826 model with lowest BIC, defined as  $BIC = n \log(RSS/n) + k \log n$  with  $n = 100^2 = 10000$   
827 the number of timepoint per participant map,  $k$  the number of parameters in the model  
828 considered and  $RSS$  the model's residual sum of squares.

## 829 5 Acknowledgments

830 We would like to thank John-Stuart Brittain for suggestions and comments on the analyses  
831 and R. Chris Miall for helpful comments on the manuscript. This work was supported by  
832 the European Research Council grant MotMotLearn 637488.

## 833 References

- 834 Ames, K. C., Ryu, S. I. & Shenoy, K. V. (2019). Simultaneous motor preparation and  
835 execution in a last-moment reach correction task. *Nature Communications*, *10*(1), 2718.  
836 doi: 10.1038/s41467-019-10772-2
- 837 Becker, M. I. & Person, A. L. (2019). Cerebellar control of reach kinematics for endpoint  
838 precision. *Neuron*, *103*(2), 335-348. doi: 10.1016/j.neuron.2019.05.007
- 839 Berret, B., Castanier, C., Bastide, S. & Deroche, T. (2018). Vigour of self-paced reaching  
840 movement: cost of time and individual traits. *Scientific Reports*, *8*(1), 10655. doi: 10.1038/  
841 s41598-018-28979-6
- 842 Bhushan, N. & Shadmehr, R. (1999). Computational nature of human adaptive control  
843 during learning of reaching movements in force fields. *Biological Cybernetics*, *81*(1),  
844 39–60. doi: 10.1007/s004220050543

- 845 Buchthal, F. & Schmalbruch, H. (1980). Motor unit of mammalian muscle. *Physiological*  
846 *Reviews*, 60(1), 90-142. doi: 10.1152/physrev.1980.60.1.90
- 847 Bundt, C., Abrahamse, E. L., Braem, S., Brass, M. & Notebaert, W. (2016). Reward anticip-  
848 ation modulates primary motor cortex excitability during task preparation. *NeuroImage*,  
849 142, 483–488. doi: 10.1016/j.neuroimage.2016.07.013
- 850 Burdet, E., Osu, R., Franklin, D. W., Yoshioka, T., Milner, T. E. & Kawato, M. (2000).  
851 A method for measuring endpoint stiffness during multi-joint arm movements. *Journal of*  
852 *Biomechanics*, 5.
- 853 Carroll, T. J., McNamee, D., Ingram, J. N. & Wolpert, D. M. (2019). Rapid visuomotor  
854 responses reflect value-based decisions. *Journal of Neuroscience*, 39(20), 3906–3920. doi:  
855 10.1523/JNEUROSCI.1934-18.2019
- 856 Chen, Holland & Galea. (2018). The effects of reward and punishment on motor skill learning.  
857 *Current Opinion in Behavioral Sciences*, 20, 83–88. doi: 10.1016/j.cobeha.2017.11.011
- 858 Chen-Harris, H., Joiner, W. M., Ethier, V., Zee, D. S. & Shadmehr, R. (2008). Adaptive  
859 control of saccades via internal feedback. *Journal of Neuroscience*, 28(11), 2804-2813. doi:  
860 10.1523/JNEUROSCI.5300-07.2008
- 861 Cohen, A. L., Sanborn, A. N. & Shiffrin, R. M. (2008). Model evaluation using grouped or  
862 individual data. *Psychonomic Bulletin & Review*, 15(4), 692-712. doi: 10.3758/PBR.15.4  
863 .692
- 864 Crevecoeur, F., Kurtzer, I., Bourke, T. & Scott, S. H. (2013). Feedback responses rapidly  
865 scale with the urgency to correct for external perturbations. *Journal of Neurophysiology*,  
866 110(6), 1323–1332. doi: 10.1152/jn.00216.2013

- 867 Dhawale, A. K., Smith, M. A. & Ölveczky, B. P. (2017). The role of variability in motor  
868 learning. *Annual Review of Neuroscience*, *40*(1), 479-498. doi: 10.1146/annurev-neuro  
869 -072116-031548
- 870 Dideriksen, J. L., Negro, F., Enoka, R. M. & Farina, D. (2012). Motor unit recruitment  
871 strategies and muscle properties determine the influence of synaptic noise on force steady-  
872 ness. *Journal of Neurophysiology*, *107*(12), 3357–3369. doi: 10.1152/jn.00938.2011
- 873 Diedrichsen, J. & Kornysheva, K. (2015). Motor skill learning between selection and execu-  
874 tion. *Trends in Cognitive Neuroscience*, *19*(4), 227-233. doi: 10.1016/j.tics.2015.02.003
- 875 Fitts, P. M. (1954). The information capacity of the human motor system in controlling  
876 the amplitude of movement. *Journal of Experimental Psychology*, *47*(6), 381–391. doi:  
877 10.1037/h0055392
- 878 Flash, T. & Hogan, N. (1985). The coordination of arm movements: an experimentally  
879 confirmed mathematical model. *The Journal of Neuroscience*, *5*(7), 1688–1703. doi: 10  
880 .1523/JNEUROSCI.05-07-01688.1985
- 881 Floeter, M. K. (2010). Structure and function of muscle fibers and motor units. In G. Karpati,  
882 D. Hilton-Jones, K. Bushby & R. C. Griggs (Eds.), *Disorders of voluntary muscle* (8th ed.,  
883 p. 1–19). Cambridge University Press. doi: 10.1017/CBO9780511674747.005
- 884 Franklin, D. W., Liaw, G., Milner, T. E., Osu, R., Burdet, E. & Kawato, M. (2007). Endpoint  
885 stiffness of the arm is directionally tuned to instability in the environment. *Journal of*  
886 *Neuroscience*, *27*(29), 7705–7716. doi: 10.1523/JNEUROSCI.0968-07.2007
- 887 Franklin, D. W., Osu, R., Burdet, E., Kawato, M. & Milner, T. E. (2003). Adaptation  
888 to stable and unstable dynamics achieved by combined impedance control and inverse  
889 dynamics model. *Journal of Neurophysiology*, *90*(5), 3270–3282. doi: 10.1152/jn.01112  
890 .2002

- 891 Frens, M. A. & Donchin, O. (2009). Forward models and state estimation in compensatory  
892 eye movements. *Frontiers in Cellular Neuroscience*, *3*. doi: 10.3389/neuro.03.013.2009
- 893 Galaro, J. K., Celnik, P. & Chib, V. S. (2019). Motor cortex excitability reflects the subjective  
894 value of reward and mediates its effects on incentive-motivated performance. *The Journal*  
895 *of Neuroscience*, *39*(7), 1236–1248. doi: 10.1523/JNEUROSCI.1254-18.2018
- 896 Galea, J. M., Mallia, E., Rothwell, J. & Diedrichsen, J. (2015). The dissociable effects of  
897 punishment and reward on motor learning. *Nature Neuroscience*, *18*(4), 597–602. doi:  
898 10.1038/nn.3956
- 899 Goodman, R. N., Rietschel, J. C., Roy, A., Jung, B. C., Diaz, J., Macko, R. F. & Forrester,  
900 L. W. (2014). Increased reward in ankle robotics training enhances motor control and  
901 cortical efficiency in stroke. *Journal of Rehabilitation Research and Development*, *51*(2),  
902 213–228. doi: 10.1682/JRRD.2013.02.0050
- 903 Gribble, P. L., Mullin, L. I., Cothros, N. & Mattar, A. (2003). Role of cocontraction in  
904 arm movement accuracy. *Journal of Neurophysiology*, *89*(5), 2396–2405. doi: 10.1152/  
905 jn.01020.2002
- 906 Hamel, R., Savoie, F.-A., Lacroix, A., Whittingstall, K., Trempe, M. & Bernier, P.-M. (2018).  
907 Added value of money on motor performance feedback: Increased left central beta-band  
908 power for rewards and fronto-central theta-band power for punishments. *NeuroImage*, *179*,  
909 63–78. doi: 10.1016/j.neuroimage.2018.06.032
- 910 Hamilton, A. F., Jones, K. E. & Wolpert, D. M. (2004). The scaling of motor noise with  
911 muscle strength and motor unit number in humans. *Experimental Brain Research*, *157*(4),  
912 417–430. doi: 10.1007/s00221-004-1856-7

- 913 Harrison, X. A., Donaldson, L., Correa-Cano, M. E., Evans, J., Fisher, D. N., Goodwin,  
914 C. E., ... Inger, R. (2018). A brief introduction to mixed effects modelling and multi-  
915 model inference in ecology. *PeerJ*, 6, e4794. doi: 10.7717/peerj.4794
- 916 Horslen, B. C., Zaback, M., Inglis, J. T., Blouin, J.-S. & Carpenter, M. G. (2018). Increased  
917 human stretch reflex dynamic sensitivity with height-induced postural threat: Increased  
918 stretch reflex dynamic sensitivity with postural threat. *The Journal of Physiology*, 596(21),  
919 5251–5265. doi: 10.1113/JP276459
- 920 Hübner, R. & Schlösser, J. (2010). Monetary reward increases attentional effort in the flanker  
921 task. *Psychonomic Bulletin & Review*, 17(6), 821–826. doi: 10.3758/PBR.17.6.821
- 922 Ikegami, T., Hirashima, M., Osu, R. & Nozaki, D. (2012). Intermittent visual feedback can  
923 boost motor learning of rhythmic movements: Evidence for error feedback beyond cycles.  
924 *Journal of Neuroscience*, 32(2), 653–657. doi: 10.1523/JNEUROSCI.4230-11.2012
- 925 Ikegami, T., Hirashima, M., Taga, G. & Nozaki, D. (2010). Asymmetric transfer of visuomo-  
926 tor learning between discrete and rhythmic movements. *Journal of Neuroscience*, 30(12),  
927 4515–4521. doi: 10.1523/JNEUROSCI.3066-09.2010
- 928 Joshua, M. & Lisberger, S. (2015). A tale of two species: Neural integration in zebrafish and  
929 monkeys. *Neuroscience*, 26, 80–91. doi: 10.1016/j.neuroscience.2014.04.048
- 930 Kasuga, S., Telgen, S., Ushiba, J., Nozaki, D. & Diedrichsen, J. (2015). Learning feedback and  
931 feedforward control in a mirror-reversed visual environment. *Journal of Neurophysiology*,  
932 114(4), 2187–2193. doi: 10.1152/jn.00096.2015
- 933 Kojima, Y. & Soetedjo, R. (2017). Selective reward affects the rate of saccade adaptation.  
934 *Neuroscience*, 355, 113–125. doi: 10.1016/j.neuroscience.2017.04.048

- 935 Lewandowsky, S. & Farrell, S. B. (2011). Considering the data: What level of analysis? In  
936 *Computational modeling in cognition: Principles and practice* (p. 96-108). Sage Publica-  
937 tions.
- 938 Llewellyn, M. E., Thompson, K. R., Deisseroth, K. & Delp, S. L. (2010). Orderly recruitment  
939 of motor units under optical control in vivo. *Nature Medicine*, *16*(10), 1161–1165. doi:  
940 10.1038/nm.2228
- 941 Manohar, S. G., Chong, T. T.-J., Apps, M. A., Batla, A., Stamelou, M., Jarman, P. R.,  
942 ... Husain, M. (2015). Reward pays the cost of noise reduction in motor and cognitive  
943 control. *Current Biology*, *25*(13), 1707–1716. doi: 10.1016/j.cub.2015.05.038
- 944 Manohar, S. G., Muhammed, K., Fallon, S. J. & Husain, M. (2019). Motivation dynamically  
945 increases noise resistance by internal feedback during movement. *Neuropsychologia*, *123*,  
946 19–29. doi: 10.1016/j.neuropsychologia.2018.07.011
- 947 Maris, E. & Oostenveld, R. (2007). Nonparametric statistical testing of eeg- and meg-data.  
948 *Journal of Neuroscience Methods*, *164*(1), 177–190. doi: 10.1016/j.jneumeth.2007.03.024
- 949 Miall, R. C., Christensen, L. O., Cain, O. & Stanley, J. (2007). Disruption of state estimation  
950 in the human lateral cerebellum. *PLoS biology*, *5*(11), e316.
- 951 Mussa-Ivaldi, F., Hogan, N. & Bizzi, E. (1985). Neural, mechanical, and geometric factors  
952 subserving arm posture in humans. *The Journal of Neuroscience*, *5*(10), 2732–2743. doi:  
953 10.1523/JNEUROSCI.05-10-02732.1985
- 954 Nichols, T. E. & Holmes, A. P. (2002). Nonparametric permutation tests for functional  
955 neuroimaging: A primer with examples. *Human Brain Mapping*, *15*(1), 1–25. doi: 10.1002/  
956 hbm.1058



- 957 Orban de Xivry, J.-J., Legrain, V. & Lefèvre, P. (2017). Overlap of movement planning and  
958 movement execution reduces reaction time. *Journal of Neurophysiology*, *117*(1), 117–122.  
959 doi: 10.1152/jn.00728.2016
- 960 Pasquereau, B., Nadjjar, A., Arkadir, D., Bezaud, E., Goillandeau, M., Bioulac, B., ...  
961 Boraud, T. (2007). Shaping of motor responses by incentive values through the basal  
962 ganglia. *Journal of Neuroscience*, *27*(5), 1176–1183. doi: 10.1523/JNEUROSCI.3745-06  
963 .2007
- 964 Perreault, E. J., Kirsch, R. F. & Crago, P. E. (2002). Voluntary control of static endpoint  
965 stiffness during force regulation tasks. *J. Neurophysiol*, *87*(6), 2808–2816. doi: 10.1152/  
966 jn.00590.2001
- 967 Porter, J. D., Baker, R. S., Ragusa, R. J. & Brueckner, J. K. (1995). Extraocular muscles:  
968 Basic and clinical aspects of structure and function. *Survey of Ophthalmology*, *39*(6),  
969 451–484. doi: 10.1016/S0039-6257(05)80055-4
- 970 Pruszynski, J. A., Kurtzer, I., Nashed, J. Y., Omrani, M., Brouwer, B. & Scott, S. H. (2011).  
971 Primary motor cortex underlies multi-joint integration for fast feedback control. *Nature*,  
972 *478*(7369), 387–390. doi: 10.1038/nature10436
- 973 Quattrocchi, G., Greenwood, R., Rothwell, J. C., Galea, J. M. & Bestmann, S. (2017). Re-  
974 ward and punishment enhance motor adaptation in stroke. *Journal of Neurology, Neurosur-*  
975 *gery & Psychiatry*, *88*(9), 730–736. doi: 10.1136/jnnp-2016-314728
- 976 Reis, J., Schambra, H. M., Cohen, L. G., Buch, E. R., Fritsch, B., Zarahn, E., ... Krakauer,  
977 J. W. (2009). Noninvasive cortical stimulation enhances motor skill acquisition over mul-  
978 tiple days through an effect on consolidation. *Proceedings of the National Academy of*  
979 *Sciences*, *106*(5), 1590–1595. doi: 10.1073/pnas.0805413106

- 980 Reppert, T. R., Lempert, K. M., Glimcher, P. W. & Shadmehr, R. (2015). Modulation  
981 of saccade vigor during value-based decision making. *Journal of Neuroscience*, *35*(46),  
982 15369-15378. doi: 10.1523/JNEUROSCI.2621-15.2015
- 983 Reppert, T. R., Rigas, I., Herzfeld, D. J., Sedaghat-Nejad, E., Komogortsev, O. & Shad-  
984 mehr, R. (2018). Movement vigor as a traitlike attribute of individuality. *Journal of*  
985 *Neurophysiology*, *120*(2), 741–757. doi: 10.1152/jn.00033.2018
- 986 Robinson, D. A. (1964). The mechanics of human saccadic eye movement. *The Journal of*  
987 *Physiology*, *174*(2), 245-264. doi: 10.1113/jphysiol.1964.sp007485
- 988 Robinson, D. A. (1981). The use of control systems analysis in the neurophysiology of  
989 eye movements. *Annual Review of Neuroscience*, *4*, 463-503. doi: 10.1146/annurev.ne.04  
990 .030181.002335
- 991 Schielzeth, H. & Nakagawa, S. (2013). Nested by design: model fitting and interpretation  
992 in a mixed model era. *Methods in Ecology and Evolution*, *4*(1), 14-24. doi: 10.1111/  
993 j.2041-210x.2012.00251.x
- 994 Selen, L. P. J., Franklin, D. W. & Wolpert, D. M. (2009). Impedance control reduces  
995 instability that arises from motor noise. *Journal of Neuroscience*, *29*(40), 12606–12616.  
996 doi: 10.1523/JNEUROSCI.2826-09.2009
- 997 Shadmehr, R. & Krakauer, J. W. (2008). A computational neuroanatomy for motor control.  
998 *Experimental Brain Research*, *185*(3), 359–381. doi: 10.1007/s00221-008-1280-5
- 999 Shmuelof, L., Yang, J., Caffo, B., Mazzoni, P. & Krakauer, J. W. (2014). The neural  
1000 correlates of learned motor acuity. *Journal of Neurophysiology*, *112*(4), 971–980. doi:  
1001 10.1152/jn.00897.2013

- 1002 Song, Y. & Smiley-Oyen, A. L. (2017). Probability differently modulating the effects of  
1003 reward and punishment on visuomotor adaptation. *Experimental Brain Research*, *235*(12),  
1004 3605–3618. doi: 10.1007/s00221-017-5082-5
- 1005 Stanley, J. & Krakauer, J. W. (2013). Motor skill depends on knowledge of facts. *Frontiers*  
1006 *in Human Neuroscience*, *7*. doi: 10.3389/fnhum.2013.00503
- 1007 Summerside, E. M., Shadmehr, R. & Ahmed, A. A. (2018). Vigor of reaching movements:  
1008 reward discounts the cost of effort. *Journal of Neurophysiology*, *119*(6), 2347–2357. doi:  
1009 10.1152/jn.00872.2017
- 1010 Takikawa, Y., Kawagoe, R., Itoh, H., Nakahara, H. & Hikosaka, O. (2002). Modulation  
1011 of saccadic eye movements by predicted reward outcome. *Experimental Brain Research*,  
1012 *142*(2), 284–291. doi: 10.1007/s00221-001-0928-1
- 1013 Telgen, S., Parvin, D. & Diedrichsen, J. (2014). Mirror reversal and visual rotation are  
1014 learned and consolidated via separate mechanisms: Recalibrating or learning de novo?  
1015 *Journal of Neuroscience*, *34*(41), 13768–13779. doi: 10.1523/JNEUROSCI.5306-13.2014
- 1016 Thabit, M. N., Nakatsuka, M., Koganemaru, S., Fawi, G., Fukuyama, H. & Mima, T. (2011).  
1017 Momentary reward induce changes in excitability of primary motor cortex. *Clinical Neuro-*  
1018 *physiology*, *122*(9), 1764–1770. doi: 10.1016/j.clinph.2011.02.021
- 1019 Todorov, E. (2004). Optimality principles in sensorimotor control. *Nature Neuroscience*,  
1020 *7*(9), 907–915. doi: 10.1038/nn1309
- 1021 Todorov, E. (2005). Stochastic optimal control and estimation methods adapted to the noise  
1022 characteristics of the sensorimotor system. *Neural Computation*, *17*(5), 1084–1108. doi:  
1023 10.1162/0899766053491887

- 1024 Ueyama, Y. & Miyashita, E. (2013). Signal-dependent noise induces muscle co-contraction to  
1025 achieve required movement accuracy: A simulation study with an optimal control. *Current*  
1026 *Bioinformatics*, 8(1), 16–24. doi: 10.2174/1574893611308010005
- 1027 Ueyama, Y. & Miyashita, E. (2014). Optimal feedback control for predicting dynamic stiffness  
1028 during arm movement. *IEEE Transactions on Industrial Electronics*, 61(2), 1044–1052.  
1029 doi: 10.1109/TIE.2013.2273473
- 1030 Ueyama, Y., Miyashita, E., Pham, T. D., Zhou, X., Tanaka, H., Oyama-Higa, M., . . . Jia,  
1031 X. (2011). Cocontraction of pairs of muscles around joints may improve an accuracy of  
1032 a reaching movement: a numerical simulation study. In *Aip conference proceedings* (Vol.  
1033 1371, p. 73–82). doi: 10.1063/1.3596629
- 1034 van Beers, R. J., Haggard, P. & Wolpert, D. M. (2004). The role of execution noise in  
1035 movement variability. *Journal of Neurophysiology*, 91(2), 1050-1063. doi: 10.1152/jn  
1036 .00652.2003
- 1037 Van Gisbergen, J. A., Robinson, D. A. & Gielen, S. (1981). A quantitative analysis of  
1038 generation of saccadic eye movements by burst neurons. *Journal of Neurophysiology*, 45(3),  
1039 417–442. doi: 10.1152/jn.1981.45.3.417
- 1040 Wachter, T., Lungu, O. V., Liu, T., Willingham, D. T. & Ashe, J. (2009). Differential  
1041 effect of reward and punishment on procedural learning. *Journal of Neuroscience*, 29(2),  
1042 436–443. doi: 10.1523/JNEUROSCI.4132-08.2009
- 1043 Weiler, J., Gribble, P. L. & Pruszynski, J. A. (2019). Spinal stretch reflexes support efficient  
1044 hand control. *Nature Neuroscience*, 22(4), 529–533. doi: 10.1038/s41593-019-0336-0
- 1045 Xu-Wilson, M., Zee, D. S. & Shadmehr, R. (2009). The intrinsic value of visual information  
1046 affects saccade velocities. *Experimental Brain Research*, 196(4), 475–481. doi: 10.1007/  
1047 s00221-009-1879-1

1048 Zuur, A. F. (2009). *Mixed effects models and extensions in ecology with r*. Springer.

1049 Zuur, A. F., Ieno, E. N. & Elphick, C. S. (2010). A protocol for data exploration to avoid  
1050 common statistical problems: Data exploration. *Methods in Ecology and Evolution*, 1(1),  
1051 3-14. Retrieved from <http://doi.wiley.com/10.1111/j.2041-210X.2009.00001.x> doi:  
1052 10.1111/j.2041-210X.2009.00001.x

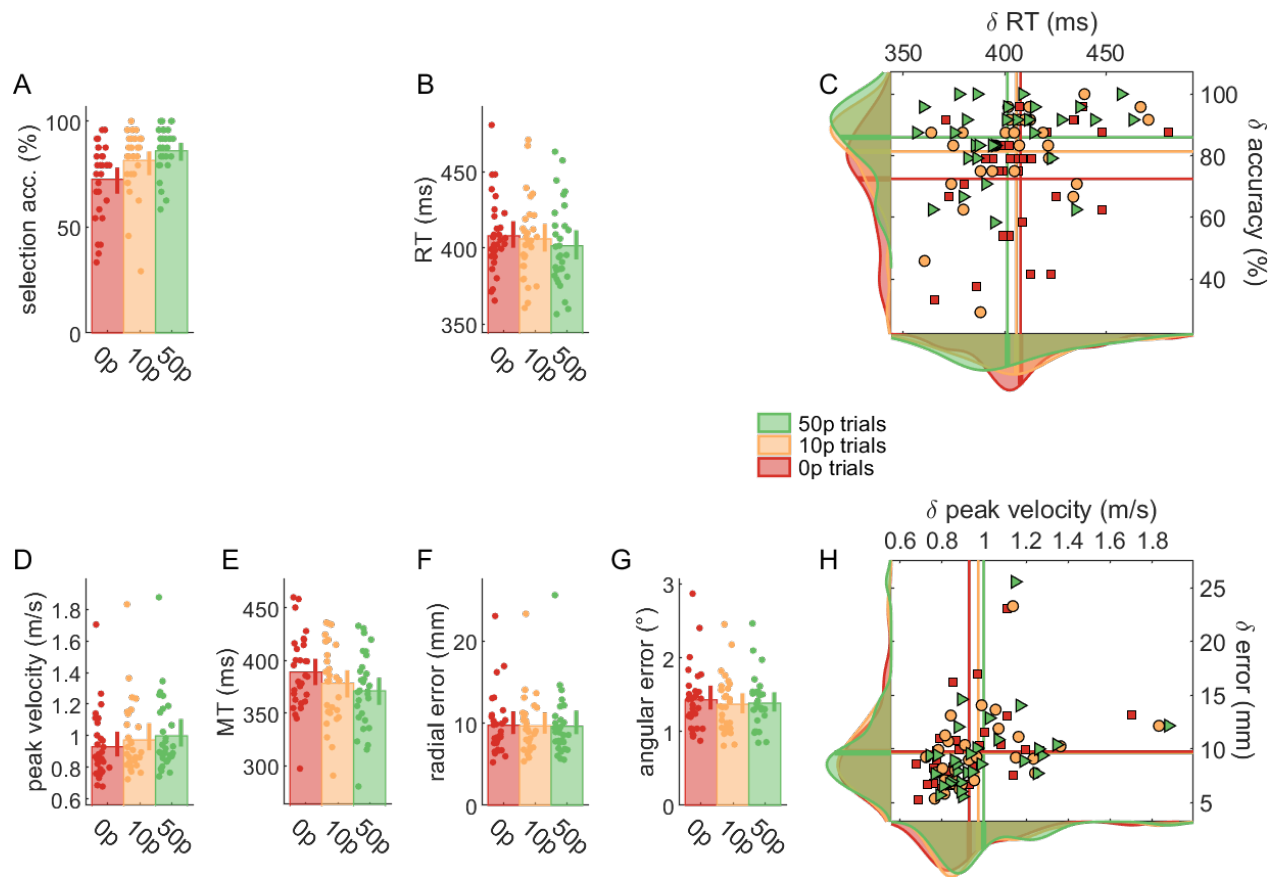

**Figure 3–Figure supplement 1.** Non-normalised data for all variables in the reward-magnitude experiment.

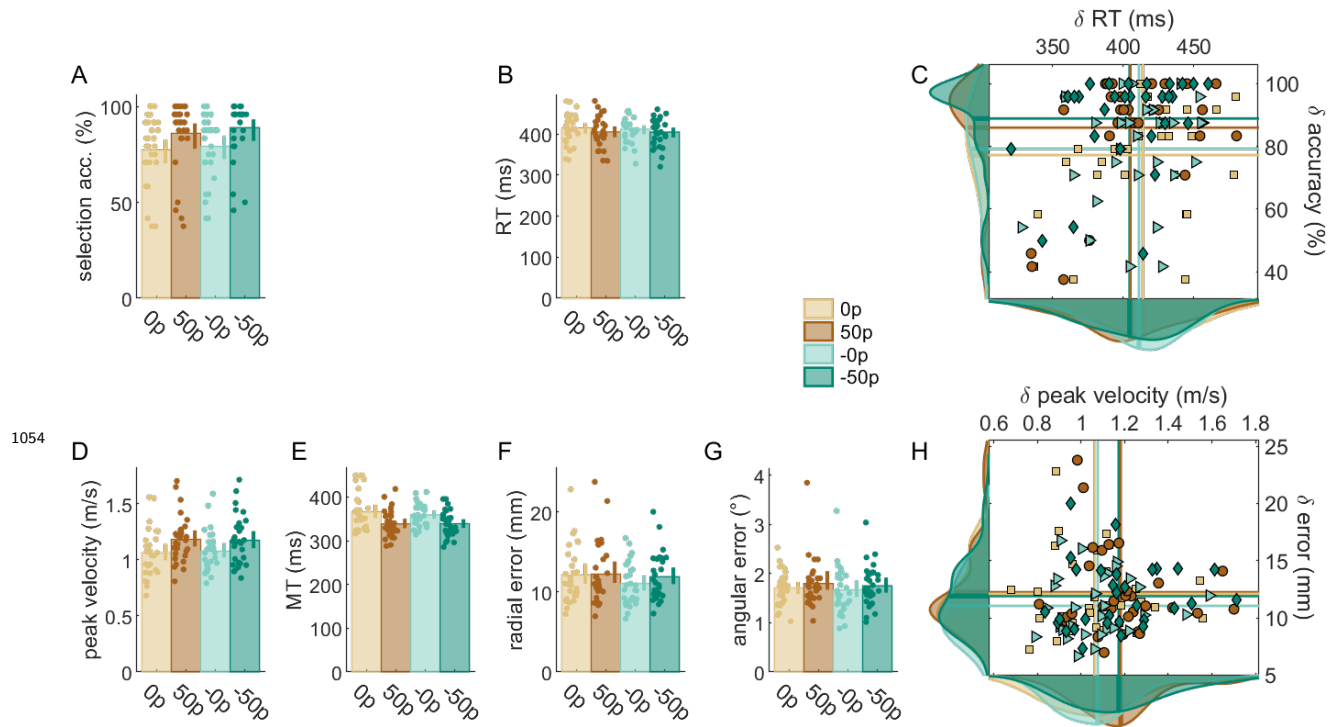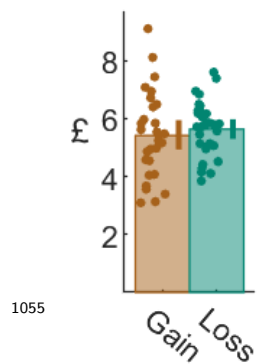

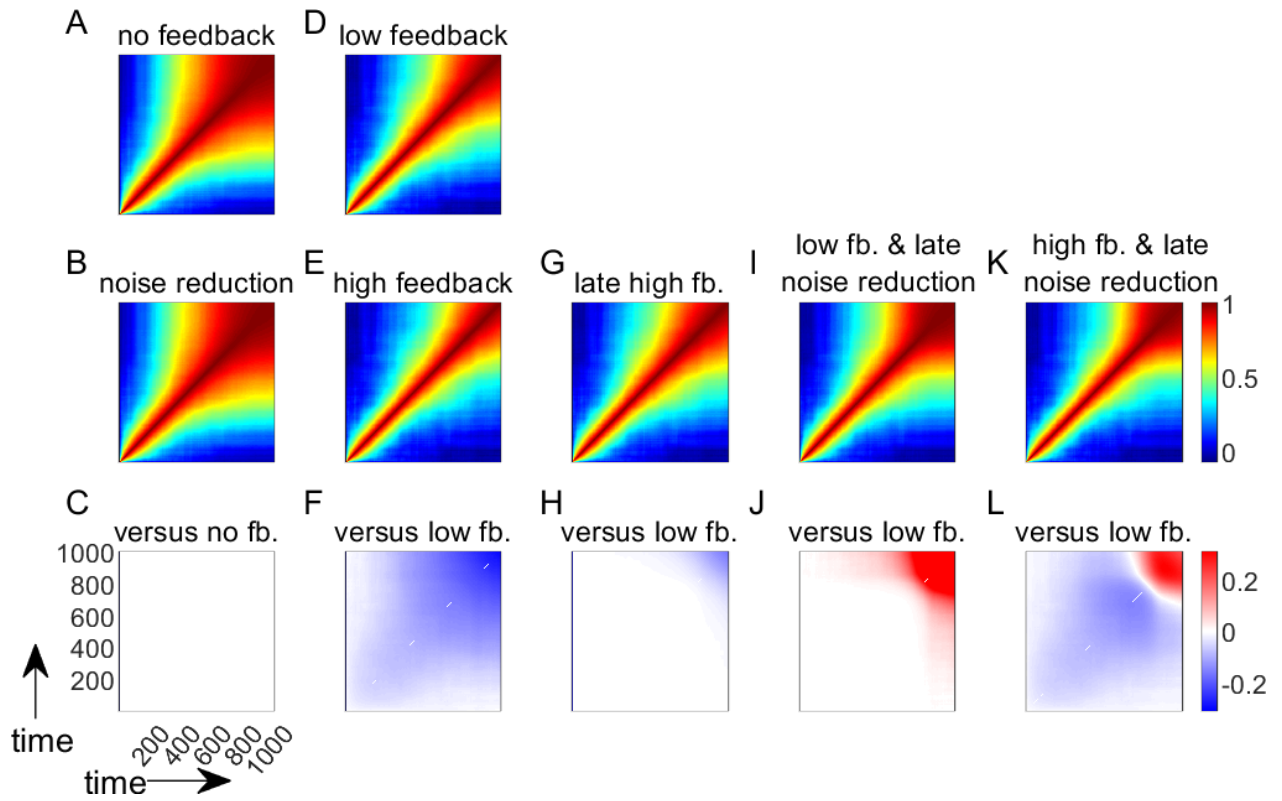

**Figure 7–Figure supplement 1.** Simulations with a bell-shaped noise term to introduce signal-dependent noise.



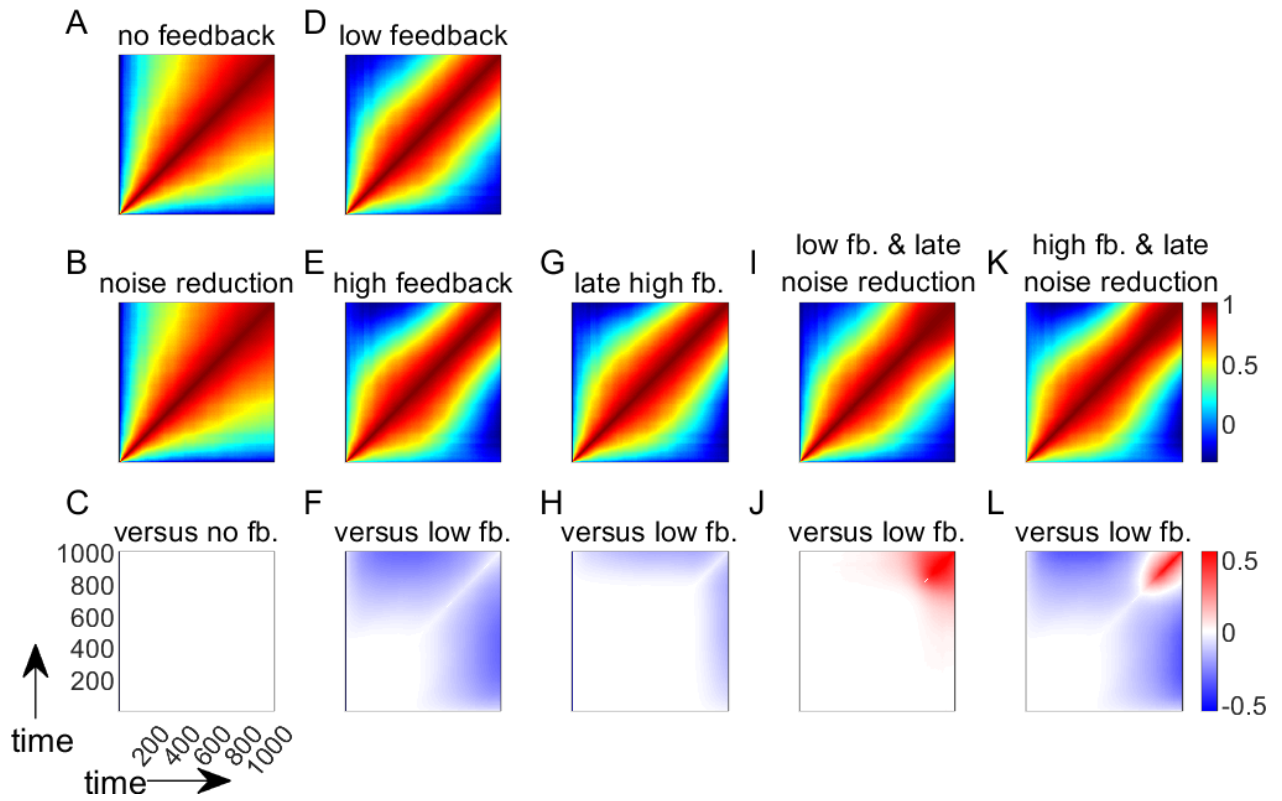

**Figure 7–Figure supplement 2.** Simulations with feedback delay of 400 timesteps.

A

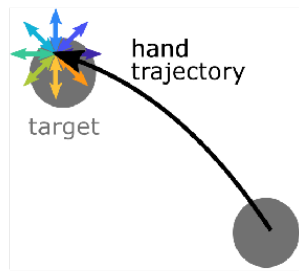

B

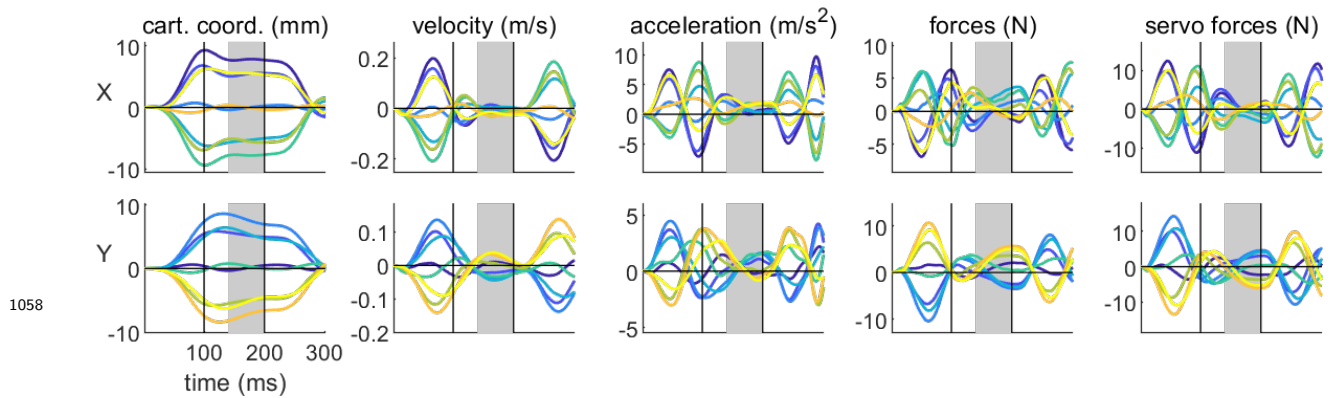

**Figure 10–Figure supplement 1. Displacement profile at the end of the reaching movement.** A. Schematic of the displacement. At the end of the movement, when velocity decreased behind a threshold of 0.3 m/s, a displacement occasionally occurred in one of 8 possible directions. Each direction is represented by a colour. B. Average displacement profile over time for the first participant on the right-hand side target. The upper and lower rows represent variables in the  $x$  and  $y$  dimension, respectively. The two vertical black solid lines demark the limit between the ramp-up and plateau, and plateau and ramp-down phase. Values for each variable were taken as the average over time during the 140-200ms window (grey area), where the displacement is clamped and most stable.

| <b>Model:</b>                                                      |                     |                     |                    |                 |                       |                 |                     |
|--------------------------------------------------------------------|---------------------|---------------------|--------------------|-----------------|-----------------------|-----------------|---------------------|
| <b>area ~ 1 + velocity + reward + (1 target) + (1 participant)</b> |                     |                     |                    |                 |                       |                 |                     |
| <i>Number of observations</i>                                      |                     |                     | 60                 |                 | <i>AIC</i>            |                 | 1562.1              |
| <i>Fixed effects coefficients</i>                                  |                     |                     | 3                  |                 | <i>BIC</i>            |                 | 1574.6              |
| <i>Random effects coefficients</i>                                 |                     |                     | 32                 |                 | <i>Log-Likelihood</i> |                 | -775.03             |
| <i>Covariance parameters</i>                                       |                     |                     | 3                  |                 | <i>Deviance</i>       |                 | 1550.1              |
| <b>Fixed effects coefficients (95% CIs):</b>                       |                     |                     |                    |                 |                       |                 |                     |
| <i>variable</i>                                                    | <i>estimate</i>     | <i>SE</i>           | <i>t-statistic</i> | <i>DF</i>       | <i>p-value</i>        | <i>lower CI</i> | <i>upper CI</i>     |
| 1059 intercept                                                     | 1.58e <sup>+5</sup> | 1.09e <sup>+5</sup> | 1.4411             | 57              | 0.15501               | -61456          | 3.77e <sup>+5</sup> |
| velocity                                                           | 84461               | 83260               | 1.0144             | 57              | 0.31467               | -82266          | 2.51e <sup>+5</sup> |
| reward                                                             | 52737               | 15180               | 3.4741             | 57              | 0.00099               | 22340           | 83134               |
| <b>Random effects covariance parameters (95% CIs):</b>             |                     |                     |                    |                 |                       |                 |                     |
| <i>variable</i>                                                    | <i>levels</i>       | <i>type</i>         | <i>estimate</i>    | <i>lower CI</i> | <i>upper CI</i>       |                 |                     |
| target                                                             | 2                   | std                 | 89384              | 28576           | 279590                |                 |                     |
| participant                                                        | 30                  | std                 | 1.2749             | 96198           | 1.69e <sup>+5</sup>   |                 |                     |
| error                                                              | 60                  | residual std        | 48540              | 37688           | 62518                 |                 |                     |

**Figure 10–Figure supplement 2. Mixed-effect model for stiffness area at the end of the reaching movement.**

| <b>Model:</b>                                                                                                |                 |              |                    |                 |                       |                 |                 |
|--------------------------------------------------------------------------------------------------------------|-----------------|--------------|--------------------|-----------------|-----------------------|-----------------|-----------------|
| <b><math>Ky \sim 1 + \text{velocity} + \text{reward} + (1 \text{target}) + (1 \text{participant})</math></b> |                 |              |                    |                 |                       |                 |                 |
| <i>Number of observations</i>                                                                                |                 | 60           |                    |                 | <i>AIC</i>            |                 | 731.43          |
| <i>Fixed effects coefficients</i>                                                                            |                 | 3            |                    |                 | <i>BIC</i>            |                 | 743.99          |
| <i>Random effects coefficients</i>                                                                           |                 | 32           |                    |                 | <i>Log-Likelihood</i> |                 | -359.71         |
| <i>Covariance parameters</i>                                                                                 |                 | 3            |                    |                 | <i>Deviance</i>       |                 | 719.43          |
| <b>Fixed effects coefficients (95% CIs):</b>                                                                 |                 |              |                    |                 |                       |                 |                 |
| <i>variable</i>                                                                                              | <i>estimate</i> | <i>SE</i>    | <i>t-statistic</i> | <i>DF</i>       | <i>p-value</i>        | <i>lower CI</i> | <i>upper CI</i> |
| 1060 intercept                                                                                               | -178.28         | 80.817       | -2.206             | 57              | 0.031432              | -340.11         | -16.447         |
| velocity                                                                                                     | -205.92         | 75.341       | -2.7331            | 57              | 0.008341              | -356.78         | -55.049         |
| reward                                                                                                       | -66.893         | 16.903       | -3.9575            | 57              | 0.000212              | -100.74         | -33.046         |
| <b>Random effects covariance parameters (95% CIs):</b>                                                       |                 |              |                    |                 |                       |                 |                 |
| <i>variable</i>                                                                                              | <i>levels</i>   | <i>type</i>  | <i>estimate</i>    | <i>lower CI</i> | <i>upper CI</i>       |                 |                 |
| target                                                                                                       | 2               | std          | $8.60e^{-5}$       | NA              | NA                    |                 |                 |
| participant                                                                                                  | 30              | std          | 107.1              | 79.9            | 143.6                 |                 |                 |
| error                                                                                                        | 60              | residual std | 58.18              | 45.16           | 74.94                 |                 |                 |

**Figure 10–Figure supplement 3. Mixed-effect model for stiffness  $Ky$  component at the end of the reaching movement.**

A

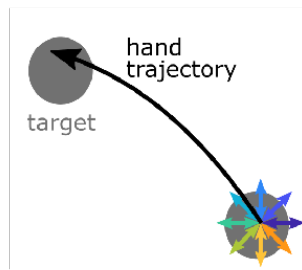

B

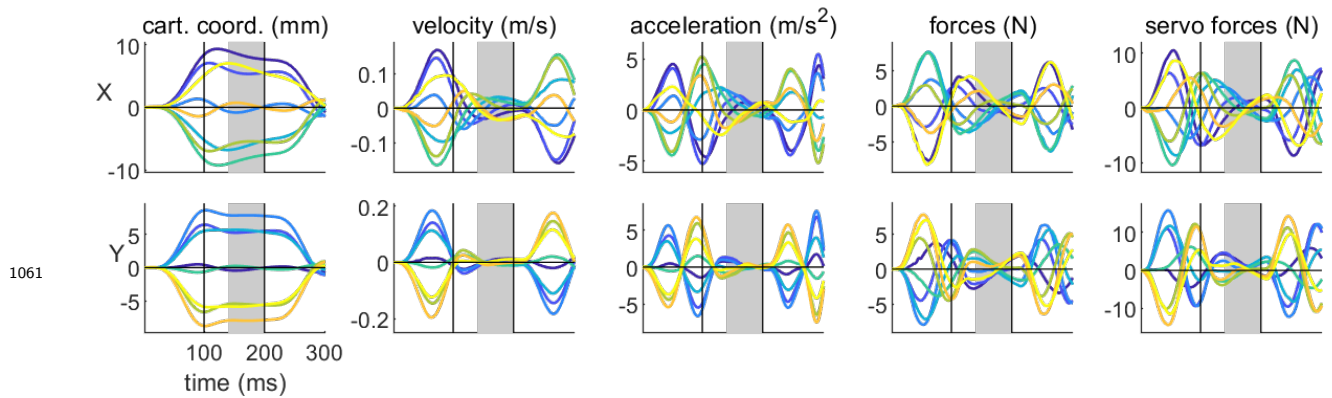

**Figure 11–Figure supplement 1. Displacement profile at the start of the reaching movement.** A. Schematic of the displacement. At the start of the movement, a displacement occasionally occurred in one of 8 possible directions. Each direction is represented by a colour. B. Average displacement profile over time for the first participant. The upper and lower rows represent variables in the  $x$  and  $y$  dimension, respectively. The two vertical black solid lines demark the limit between the ramp-up and plateau, and plateau and ramp-down phase. Values for each variable were taken as the average over time during the 140-200ms window (grey area), where the displacement is clamped and most stable.

| <b>Model:</b>                                          |                 |              |                    |                 |                       |                 |                 |
|--------------------------------------------------------|-----------------|--------------|--------------------|-----------------|-----------------------|-----------------|-----------------|
| <b>area ~ 1 + velocity + reward + (1 participant)</b>  |                 |              |                    |                 |                       |                 |                 |
| <i>Number of observations</i>                          |                 | 40           |                    |                 | <i>AIC</i>            |                 | 1000.4          |
| <i>Fixed effects coefficients</i>                      |                 | 3            |                    |                 | <i>BIC</i>            |                 | 1009.9          |
| <i>Random effects coefficients</i>                     |                 | 20           |                    |                 | <i>Log-Likelihood</i> |                 | -495.22         |
| <i>Covariance parameters</i>                           |                 | 2            |                    |                 | <i>Deviance</i>       |                 | 990.45          |
| <b>Fixed effects coefficients (95% CIs):</b>           |                 |              |                    |                 |                       |                 |                 |
| <i>variable</i>                                        | <i>estimate</i> | <i>SE</i>    | <i>t-statistic</i> | <i>DF</i>       | <i>p-value</i>        | <i>lower CI</i> | <i>upper CI</i> |
| <sup>1062</sup> intercept                              | 176720          | 105090       | 1.6817             | 37              | 0.10106               | -36206          | 389640          |
| velocity                                               | -34147          | 106840       | -0.3196            | 37              | 0.75107               | -250630         | 182330          |
| reward                                                 | 11547           | 12086        | 0.95537            | 37              | 0.34559               | -12942          | 36036           |
| <b>Random effects covariance parameters (95% CIs):</b> |                 |              |                    |                 |                       |                 |                 |
| <i>variable</i>                                        | <i>levels</i>   | <i>type</i>  | <i>estimate</i>    | <i>lower CI</i> | <i>upper CI</i>       |                 |                 |
| participant                                            | 20              | std          | 104260             | 75922           | 143160                |                 |                 |
| error                                                  | NA              | residual std | 22268              | 16332           | 30360                 |                 |                 |

**Figure 11–Figure supplement 2. Mixed-effect model for stiffness area at the start of the movement.**

| <b>Model:</b>                                                                            |                 |              |                    |                 |                       |                 |                 |
|------------------------------------------------------------------------------------------|-----------------|--------------|--------------------|-----------------|-----------------------|-----------------|-----------------|
| <b><math>Ky \sim 1 + \text{velocity} + \text{reward} + (1 \text{participant})</math></b> |                 |              |                    |                 |                       |                 |                 |
| <i>Number of observations</i>                                                            |                 | 40           |                    |                 | <i>AIC</i>            |                 | 460.82          |
| <i>Fixed effects coefficients</i>                                                        |                 | 3            |                    |                 | <i>BIC</i>            |                 | 469.27          |
| <i>Random effects coefficients</i>                                                       |                 | 20           |                    |                 | <i>Log-Likelihood</i> |                 | -225.41         |
| <i>Covariance parameters</i>                                                             |                 | 2            |                    |                 | <i>Deviance</i>       |                 | 450.82          |
| <b>Fixed effects coefficients (95% CIs):</b>                                             |                 |              |                    |                 |                       |                 |                 |
| <i>variable</i>                                                                          | <i>estimate</i> | <i>SE</i>    | <i>t-statistic</i> | <i>DF</i>       | <i>p-value</i>        | <i>lower CI</i> | <i>upper CI</i> |
| <sup>1063</sup> intercept                                                                | -421.01         | 134.26       | -3.188             | 37              | 0.0029121             | -700.04         | -155.98         |
| velocity                                                                                 | 184.74          | 138.08       | 1.3379             | 37              | 0.18909               | -95.041         | 464.53          |
| reward                                                                                   | -12.34          | 16.319       | -0.75617           | 37              | 0.45434               | -45.406         | 20.726          |
| <b>Random effects covariance parameters (95% CIs):</b>                                   |                 |              |                    |                 |                       |                 |                 |
| <i>variable</i>                                                                          | <i>levels</i>   | <i>type</i>  | <i>estimate</i>    | <i>lower CI</i> | <i>upper CI</i>       |                 |                 |
| participant                                                                              | 30              | std          | 97.543             | 70.244          | 135.45                |                 |                 |
| error                                                                                    | NA              | residual std | 32.425             | 23.767          | 44.237                |                 |                 |

**Figure 11–Figure supplement 3. Mixed-effect model for stiffness  $Ky$  component at the start of the movement.**
